1     **Transcriptomic analyses of MYCN-regulated genes in anaplastic**  
2     **Wilms' tumour cell lines reveals oncogenic pathways and potential**  
3                     **therapeutic vulnerabilities**

4     Marianna Szemes<sup>1\*</sup>, Zsombor Melegh<sup>2</sup>, Jacob Bellamy<sup>1</sup>, Ji Hyun Park<sup>1</sup>, Biyao  
5     Chen<sup>1</sup>, Alexander Greenhough<sup>1,3</sup>, Daniel Catchpoole<sup>4</sup> and Karim Malik<sup>1\*</sup>

6     <sup>1</sup>Cancer Epigenetics Laboratory, School of Cellular and Molecular Medicine,  
7     University of Bristol, Bristol, UK.

8     <sup>2</sup>Department of Cellular Pathology, Southmead Hospital, Bristol, UK.

9     <sup>3</sup>Applied Sciences, University of the West of England. Bristol, UK.

10    <sup>4</sup>The Kids Research Institute, The Children's Hospital at Westmead, Westmead,  
11    New South Wales 2145, Australia.

12    \* **Correspondence:** K.T.A.Malik@bristol.ac.uk; M.Szemes@bristol.ac.uk

13    **Running title:** Transcriptomic analysis of MYCN-regulated genes in Wilms' tumour

14    **Keywords:** Wilms' tumour, MYCN, REST, PRMT, TOMM20, RNA-seq.

15    **Abbreviations:**

16    ADMA        asymmetric di-methyl arginine

17    CM           condensing mesenchyme

18    DEG          differentially expressed genes

19    ECL          enhanced chemiluminescence

20    FACS         fluorescence activated cell sorting

21    FDR          false discovery rate

22    FHWT         favourable histology Wilms' tumour

23    FK            fetal kidney

|    |      |                                   |
|----|------|-----------------------------------|
| 24 | GO   | Gene ontology                     |
| 25 | GSEA | Geneset Enrichment Analysis       |
| 26 | HRP  | horseradish peroxidase            |
| 27 | IHC  | immunohistochemistry              |
| 28 | MNA  | MYCN-amplified                    |
| 29 | NB   | neuroblastoma                     |
| 30 | NES  | normalised enrichment score       |
| 31 | PTA  | pre-tubular aggregates            |
| 32 | R-Me | arginine methylation              |
| 33 | SDMA | symmetric di-methyl arginine      |
| 34 | TIM  | translocase of the inner membrane |
| 35 | TMA  | tissue microarray                 |
| 36 | TOM  | translocase of the outer membrane |
| 37 | UB   | ureteric bud                      |
| 38 | WT   | Wilms' tumour                     |
| 39 |      |                                   |

40 **Abstract**

41 The *MYCN* proto-oncogene is deregulated in many cancers, most notably in  
42 neuroblastoma where *MYCN* gene amplification identifies a clinical subset with very  
43 poor prognosis. Gene expression and DNA analyses have also demonstrated over-  
44 expression of *MYCN* mRNA, as well as focal amplifications, copy number gains and  
45 presumptive change of function mutations of *MYCN* in Wilms' tumours with poorer  
46 outcome, including tumours with diffuse anaplasia. Surprisingly, however, the  
47 expression and functions of the MYCN protein in Wilms' tumours still remain  
48 obscure.

49 In this study, we assessed MYCN protein expression in primary Wilms'  
50 tumours using immunohistochemistry of tissue microarrays. We found MYCN  
51 protein to be expressed in tumour blastemal cells, and absent in stromal and  
52 epithelial components. For functional studies, we used two anaplastic Wilms'  
53 tumour cell-lines, WiT49 and 17.94, to study the biological and transcriptomic  
54 effects of MYCN depletion. We found that MYCN knockdown consistently led to  
55 growth suppression but not cell death. RNA sequencing identified 561 MYCN-  
56 regulated genes shared by WiT49 and 17.94 cell-lines. As expected, numerous  
57 cellular processes were downstream of MYCN. MYCN positively regulated the  
58 miRNA regulator and known Wilms' tumour oncogene *LIN28B*, the genes encoding  
59 methylosome proteins PRMT1, PRMT5 and WDR77, and the mitochondrial  
60 translocase genes *TOMM20* and *TIMM50*. MYCN repressed genes included the  
61 developmental signalling receptor *ROBO1* and the stromal marker *COL1A1*.  
62 Importantly, we found that MYCN also repressed the presumptive Wilms' tumour  
63 suppressor gene *REST*, with MYCN knockdown resulting in increased REST  
64 protein and concomitant repression of REST target genes. Together, our study

65 identifies regulatory axes that interact with MYCN, providing novel pathways for  
66 potential targeted therapeutics for poor prognosis Wilms' tumour.

67

## 68 **1. Introduction**

69 Wilms' tumour (WT) is the most common paediatric renal malignancy. WT  
70 can broadly be categorized as favourable histology (FHWT) or anaplastic. Whilst  
71 survival of FHWT patients after neoadjuvant therapy has improved overall survival,  
72 patients often relapse and experience extensive side-effects as a result of current  
73 therapies, with survivors remaining at elevated risk for death long after their  
74 diagnosis. Stage III-IV tumours, including anaplastic WT can have markedly worse  
75 prognosis, with a 4-year survival rate as low as ~50%. Thus there remains a critical  
76 requirement for more personalised, targeted therapies to prevent severe illness and  
77 death from WT (1,2).

78 The earliest genetic analyses of WT showed loss-of-function mutations in  
79 *WT1* (3,4), missense *TP53* mutations (5) and gain-of-function *CTNNB1* mutations  
80 resulting in activation of Wnt signalling (6). These mutations segregate with WT  
81 subtypes, for example *WT1* and *CTNNB1* mutations in stromal-predominant WT,  
82 and *TP53* in anaplastic WTs (5,7,8). More recent genome sequencing studies have  
83 found further mutations, including *MYCN*, *REST*, *SIX1/2*, *DROSHA* and *DICER* (7-  
84 9), reported in approximately half of all WTs. Inactivating mutations of *REST* were  
85 also independently reported, implicating it as a WT tumour suppressor gene in  
86 familial and non-familial WT (10).

87 Together with previous studies demonstrating *MYCN* gain and *FBXW7* loss  
88 associated with diffuse anaplasia and poorer outcome even in the absence of  
89 anaplasia, and focal amplifications of *MYCN* in anaplastic WTs (11,12), these  
90 whole-genome sequencing analyses suggest an oncogenic role for *MYCN* in WT.  
91 This is further supported by the fact that several groups documented *MYCN* mRNA  
92 over-expression in WTs, and its association with poor prognosis (13-15). Together

93 this strongly implicates *MYCN* deregulation in Wilms' tumorigenesis. However,  
94 despite *MYCN* being known to be important in proliferation of mesenchymal  
95 progenitor cells during nephrogenesis (16) and an established oncogenic  
96 transcription factor of developmental cancers such as medulloblastoma and  
97 neuroblastoma (NB) (17), virtually nothing is known about the biological activities of  
98 *MYCN* in WT, including protein expression patterns, downstream transcriptional  
99 targets, and possible pathways regulated.

100 In this study, we report the first analysis of *MYCN* protein in primary WTs.  
101 Furthermore, our functional analyses demonstrate that *MYCN* regulates  
102 proliferation of anaplastic WT cell-lines. RNA sequencing of these cell-lines after  
103 *MYCN* depletion identifies novel growth control pathways regulated by *MYCN*,  
104 including intersection with the function of the putative WT tumour suppressor gene,  
105 *REST* (RE1-Silencing Transcription factor).

106

## 107 **2. Materials and Methods**

### 108 ***2.1. Wilms' tumour cell-lines, culture conditions and siRNA treatments***

109 Wit49 (18) and 17.94 (19) anaplastic WT cell-lines were kind gifts from Prof.  
110 Herman Yeger and Dr. Keith Brown, respectively. The identity of both cell-lines was  
111 confirmed by short tandem repeat (STR) analysis. Wit49 cells were cultured at 37°C  
112 under 5% CO<sub>2</sub>, in Dulbecco's modified Eagle's medium supplemented with 15%  
113 fetal calf serum, 2 mmol/L L-glutamine, 0.1 mg/mL penicillin/streptomycin,  
114 0.6%(v/v) β-mercaptoethanol and 1x insulin–transferrin–selenium, all purchased  
115 from Sigma. 17.94 cells were grown in Dulbecco's modified Eagle's medium  
116 supplemented with 10% fetal calf serum, L-glutamine and penicillin and  
117 streptomycin. Absence of Mycoplasma infection was confirmed by Mycoalert  
118 Mycoplasma Detection Kit (Lonza). Knock-down experiments were performed by  
119 using RNAiMAX reagent (Invitrogen) with 20 nM siRNA, according to  
120 manufacturer's instructions. Oligonucleotide sequences are shown in  
121 Supplementary Table 1.

### 122 ***2.2. Cell cycle analysis and cell counting***

123 Propidium-iodide labelling and fluorescence activated cell sorting (FACS)  
124 analysis was used to detect cell cycle phases. Floating and adherent cells were  
125 collected, washed with PBS, fixed with ice cold 70% (v/v) ethanol and treated with  
126 RNase A (Qiagen). After adding 50 µg/mL Propidium Iodide (Sigma), the samples  
127 were incubated at 37°C for 15 minutes, and analysed on Fluorescence Activated  
128 Cell Sorter LSRFortessa™ X-20 (BD Biosciences). About 15,000 events were  
129 collected for each replicate and data was analyzed by using FlowJo software. Cell  
130 counting was performed by using Countess automated cell counter (Invitrogen) and  
131 trypan blue staining.

### 132 **2.3. Immunohistochemistry**

133 Tissue microarrays, containing 33 pre-chemotherapy, Wilms' tumor samples  
134 and fetal and adult kidney sections were stained by using a MYCN antibody  
135 (Proteintech, 10159-2-AP, Lot no: 18121). Immunohistochemistry staining was  
136 scored as positive or negative by a pathologist blinded to the specimens. All human  
137 tissues were acquired in compliance with the NSW Human Tissue and Anatomy  
138 Legislation Amendment Act 2003 (Australia). Ethics clearances 09/CHW/159 and  
139 LNR/14/SCHN/392 were approved by the Sydney Children's Hospital Network  
140 Human Research Ethics Committee to construct TMAs and use clinical data, which  
141 was deidentified. Immunohistochemistry was performed with a Leica Microsystem  
142 Bond III automated machine by using the Bond Polymer Refine Detection Kit (Ref  
143 DS9800) followed by Bond Dab Enhancer (AR9432). The slides were dewaxed with  
144 Bond Dewax Solution (AR9222) and heat mediated antigen retrieval was performed  
145 using Bond Epitope Retrieval Solution for 20 minutes.

### 146 **2.4. Protein Extraction and Western Blot**

147 Cells were lysed in Radioimmunoprecipitation assay (RIPA) buffer and  
148 protein concentration was determined by using Micro BCA TM protein assay kit  
149 (Thermo Fisher). Protein extracts were loaded onto SDS poly-acrylamide gels and  
150 run in 1x Tris-glycine SDS buffer. After transfer onto PVDF membrane (Millipore) by  
151 a wet protocol (Bio-Rad), the membrane was blocked in 5% (w/v) skimmed milk,  
152 incubated with primary antibody solution at 4 °C overnight, and HRP labelled  
153 secondary antibody solution the next day. Proteins were visualised by using ECL  
154 reagents (Lumiglo, KPL) and X-ray films. The antibodies used are listed in  
155 Supplementary Table 2. Western blot image data were quantified by using ImageJ



156 software (<http://imagej.nih.gov/ij/>). Target protein band density was normalized to  
157 the respective loading control and to the normalized intensity of the control sample.

## 158 **2.5. RNA extraction, reverse transcription and qPCR**

159 RNA was extracted by using the miRNeasy kit (QIAGEN), according to  
160 manufacturer's instructions. RNAs were treated with on column DNase digestion  
161 using RNase-free DNase (Qiagen). RNA was transcribed with Superscript IV  
162 (Invitrogen) using a mixture of oligodT and random hexamer primers. Quantitative  
163 PCR was performed by using QuantiNova kit (Qiagen) on Mx3500P (Stratagene).  
164 The house-keeping gene TBP was used as a normalizing control. Relative gene  
165 expression was calculated using the  $\Delta\Delta C_t$  method – log<sub>2</sub> fold changes between  
166 MYCN-depleted and control samples were calculated after normalization to TBP.  
167 Statistical significance of log<sub>2</sub>-transformed fold changes in gene expression was  
168 evaluated by using two-tailed, Student's T-tests. The oligonucleotide primers used  
169 in this study are shown in Supplementary Table 1.

## 170 **2.6. RNA-seq and bioinformatic analysis**

171 Wit49 and 17.94 cells were treated with MYCN-targeting and control siRNAs  
172 for 48 hours, and were subsequently harvested in Qiazol (Qiagen). RNA was  
173 extracted by using the miRNeasy Kit (Qiagen). RNA concentration and quality were  
174 checked by using a Nanodrop spectrophotometer and Bioanalyzer (Agilent).  
175 Libraries were prepared from 200 ng RNA and were sequenced by using the  
176 paired-end option with 100 bp reads on BGISEQ-500 (BGI Genomics). The reads  
177 were aligned to the human genome (hg38) by using STAR and the alignment files  
178 (BAM) files were further analysed in SeqMonk v1.47.  
179 (<https://www.bioinformatics.babraham.ac.uk/projects/seqmonk/>). Gene expression  
180 was quantified by using the Seqmonk RNA-seq analysis pipeline and differentially

181 expressed genes (DEG) were identified by DESEQ2 ( $p < 0.05$ ), and a minimum  
182 shrunk fold difference threshold, a conservative corrected value of fold change  
183 taking confidence into account, of 1.2 was applied. RNA sequencing data is  
184 available from the European Nucleotide Archive (ENA) under the accession number  
185 ERP125499. Gene Signature Enrichment Analyses (GSEAs) were performed on  
186 preranked lists of log<sub>2</sub>-transformed, shrunk fold difference gene expression values  
187 (Broad Institute). Gene expression analysis of published Wilms' tumour data sets  
188 and K means clustering were performed by using the R2 Genomics Analysis and  
189 Visualization Platform (<http://r2.amc.nl>).

## 190 **2.7 Statistical analysis**

191 Statistical analysis of quantitative PCR data was performed on log<sub>2</sub>-  
192 transformed fold change values, by using two-tailed Student's T-tests. Gene Set  
193 Enrichment Analysis of RNA-seq data was evaluated based on Normalised  
194 Enrichment Score (NES) and False Discovery Rate (FDR), which was calculated  
195 based on permutation of genes with a rank score of log<sub>2</sub> fold change expression  
196 over control. Differentially expressed genes (DEGs) in MYCN-depleted Wilms'  
197 tumour cells, detected by using RNA-seq, were assessed using the statistical model  
198 implemented in DESEQ2. Significance of correlation between clusters of TARGET  
199 WT data and clinical correlates was assessed by using Chi-square test. Differential  
200 expression of genes and metagenes, which represent gene signatures, among  
201 groups of WT and fetal kidney tissue, was evaluated by using ANOVA.

202

### 203 **3. Results & Discussion**

#### 204 ***3.1 MYCN protein is overexpressed in the blastemal component of Wilms'*** 205 ***tumour and promotes proliferation in Wilms' tumour cells.***

206 Over-expression of *MYCN* mRNA has been reported in poor prognosis  
207 Wilms' tumour (13-15,20) but the prevalence and pattern of *MYCN* protein  
208 expression in Wilms' tumours has, to our knowledge, never been published.  
209 Therefore, we performed *MYCN* immunohistochemistry (IHC) on tissue microarrays  
210 (TMAs), containing 33 pre-chemotherapy WT sections (Figure 1). As a normal  
211 control, we used a section of a fetal kidney, derived from a 13-week old fetus, as  
212 well as an adult, healthy kidney. *MYCN* was detected in 14 tumours, exclusively in  
213 the blastemal component. It was localised mostly to the nucleus, but we also  
214 detected cytoplasmic staining, with three tumours displaying cytoplasmic staining  
215 only. In contrast, in normal fetal kidney, *MYCN* was detected solely in the distal  
216 tubules, but not in the blastema, while *MYCN* protein was completely absent from  
217 the adult kidney (Supplementary figure 1). Although the number of tumours  
218 precluded statistical analysis, our data demonstrates for the first time that *MYCN*  
219 protein is expressed in the blastemal cells of Wilms' tumours.

220 To characterize the effect of *MYCN* on growth of Wilms' tumour cells, we  
221 knocked it down in two anaplastic WT cell-lines, Wit49 and 17.94 (Figure 2). After  
222 120 hours of *MYCN* depletion by two independent *MYCN*-targeting siRNAs, there  
223 was a substantial and significant reduction in live cell counts ( $p < 0.01$ ). The number  
224 of dead cells did not increase, suggesting that the decrease in live cells was due to  
225 growth inhibition rather than increased cell death. To investigate the effect of *MYCN*  
226 depletion on the cell cycle, we performed a cell cycle analysis on Wit49  
227 (Supplementary figure 2). *MYCN* knock-down by either siRNA led to a significant

228 reduction of cells in S phase, while the proportion of cells in G2/M increased  
229 significantly ( $p < 0.01$ ), indicative of a G2/M arrest. There was no increase of cells in  
230 the sub-G1 phase, in agreement with our previous observation of no increase in  
231 dead cell counts. These studies suggest that MYCN primarily exerts control over  
232 WT proliferative pathways as opposed to apoptosis and cell survival.

### 233 **3.2 MYCN-regulated gene signatures in Wilms' tumour reveal downstream** 234 **growth-regulatory pathways**

235 To identify MYCN regulated genes in Wilms' tumour, we performed RNA-seq  
236 of both anaplastic WT cell-lines following MYCN knockdown (Supplementary figure  
237 3A). MYCN regulated genes were defined as differentially expressed genes (DEGs)  
238 that had a significant ( $p < 0.05$ ) and substantial change (minimum 'shrunk' fold  
239 change, a corrected value based on confidence, of 1.2) in their expression levels,  
240 as assessed by using DESEQ2. We found 1060 upregulated genes in Wit49 and  
241 396 in 17.94, with a highly significant overlap of 212 genes between the 2 cell-lines  
242 ( $p < 10^{-10}$ ) (Figure 3A). There were 349 downregulated genes shared by the two  
243 cell-lines, with 1086 and 699 identified in Wit49 and 17.94, respectively ( $p < 10^{-10}$ ).  
244 The shared 561 MYCN-regulated genes in WT are shown in Supplementary table 3.  
245 and Figure 3B. Known MYCN target genes, and genes related to WT or kidney  
246 development are highlighted on the heatmaps. A panel of the DEGs identified by  
247 RNA-seq after MYCN knockdown were validated in both cell-lines by qPCR. We  
248 confirmed downregulation of *LIN28B*, a MYCN target gene in neuroblastoma (21),  
249 both at the RNA (Figure 3C) and protein level (Supplementary figure 3B). *LIN28B* is  
250 an established regulator of nephrogenesis, promoting expansion of the progenitor  
251 pool, and a direct oncogenic driver in WT (22,23). *LIN28B* suppresses *let-7*  
252 miRNAs, but can also influence gene expression via other mechanisms, including

253 regulation of translation (24). Therefore MYCN is likely to exert control at the post-  
254 transcriptional as well as the transcriptomic level.

255         Amongst the novel genes, one of the biggest expression changes was the  
256 *ROBO1* gene, which increased over 4-fold after MYCN knockdown in both WT cell-  
257 lines (Figure 3C). *ROBO1* encodes the transmembrane Roundabout Guidance  
258 Receptor 1 involved in SLIT/ROBO signalling, a key developmental pathway (25).  
259 *Robo1* is a tumour suppressor gene in other cellular systems, with *Robo1* knockout  
260 mice predisposing to lung adenocarcinomas and lymphomas (26). Other studies  
261 have indicated that Slit/Robo signalling is required for normal kidney development  
262 (27), and *Robo1* expression increases in the pretubular aggregates compared to  
263 the metanephric mesenchyme, implying a role for Robo1 in early renal  
264 differentiation (28). We also note that *SLIT2* is frequently epigenetically silenced in  
265 WTs (29), further supporting a tumour suppressive role for SLIT/ROBO signalling in  
266 WT.

267         Gene set enrichment analysis indicated that MYCN repressed kidney  
268 differentiation and developmental genes (Supplementary figure 3C). To study how  
269 MYCN influences cell differentiation during nephrogenesis, we queried gene  
270 signatures characteristic of different cell populations in the fetal kidney, determined  
271 by Menon et al. by using single cell RNA-seq (30). We found that MYCN activated  
272 genes were overexpressed in proliferating cells, while gene signatures of both  
273 podocytes and stromal cells were repressed by MYCN, consistent with a role for  
274 MYCN in promoting growth and repressing differentiation (Supplementary Figure  
275 3D). *COL1A1*, a marker gene for stromal cells, was upregulated more than two-fold  
276 in our RNA-seq data after MYCN depletion. Moreover, COL1A1 protein is

277 documented to be significantly downregulated in anaplastic WT compared to  
278 favorable histology WT (31).

279 MYCN targets have been extensively studied in NB and several target lists  
280 were described. We compared our WT-specific MYCN targets to some identified by  
281 transcriptomic and chromatin immunoprecipitation analyses in NB, specifically (i)  
282 the MYCN157 signature, derived from IMR32 cell-line DEGs following MYCN  
283 knockdown, subsequently filtered by correlation with MYCN mRNA expression in  
284 primary NBs (32), (ii) DEGs from a MYCN-overexpressing isogenic model (33) and  
285 (iii) genes bound by MYCN and correlated with MYCN in the SEQC NB expression  
286 dataset (GSE49712) (34) (Figure 3D). We found surprisingly little overlap of our top  
287 DEGs with these NB-specific MYCN targets, emphasizing the importance of cellular  
288 context. To characterize the function of the newly identified MYCN regulated genes,  
289 we performed a Gene Ontology (GO) enrichment analysis (Supplementary table 4.).  
290 The most highly enriched component was the 'RNA nuclear export complex'  
291 (GO:0042565), including *XPO5* and *RAN*, responsible for the transport of pre-  
292 miRNAs from the nucleus, suggesting that MYCN may substantially alter the  
293 miRNA profile in the cytoplasm. Mutations in *DICER* and *DROSHA*, key enzymes in  
294 microRNA biogenesis, were previously shown to be involved in WT pathogenesis  
295 (8). The WT-specific MYCN regulated genes were also enriched in GO categories  
296 related to mitochondrial, ribosomal, spliceosomal and methylosome complexes and  
297 telomere maintenance, emphasizing the control of several major cellular processes  
298 by MYCN.

299 To obtain an extended global overview of the transcriptional control of MYCN  
300 in WT, we performed Gene Set Enrichment Analyses (GSEA) with the DEGs from  
301 Wit49 and 17.94 cell-lines. GSEA revealed that MYCN knockdown led to activation

302 of genes downregulated in WT relative to fetal kidney (Figure 3E) (35), and  
303 repression of genes elevated in WT relative to fetal kidney (Supplementary Figure  
304 4A). Thus MYCN knockdown reverses, at least in part, the WT-specific signature.

305 MYCN activated genes in the MYCN157 signature were significantly  
306 downregulated, showing regulation of the NB-specific target genes in WT cells,  
307 despite the minimal overlap of our top DEGs (with the biggest or most significant  
308 changes) with top MYCN targets in NB. Similarly, several MYC target gene sets  
309 were downregulated in both cell-lines, indicating that MYCN drives canonical MYC  
310 target genes in WT (Supplementary figure 4B), like the curated MYC gene set in  
311 Hallmark (36). Further, genes encoding mitochondrial proteins that were recently  
312 shown to be regulated by MYCN (37) were also down-regulated, emphasizing the  
313 role of MYCN in activating mitochondrial function genes in WT. Genes encoding for  
314 proteins with roles in 'RNA export from nucleus' were down-regulated, which may  
315 affect pre-miRNA transport and the miRNA pool in the cytoplasm, while those  
316 participating in 'Unfolded protein response' were up, suggestive of endoplasmic  
317 reticulum stress in the MYCN depleted cells (Supplementary figure 4C).

318 Gene signatures related to ribosomal biogenesis, splicing, and mitochondria  
319 were all found to be down-regulated following MYCN knockdown, reinforcing the  
320 results of GO analysis with shared WT-specific MYCN-regulated genes (Figure 3E).  
321 In fact, all the Gene Ontology signatures related to to ribosomal function, RNA  
322 processing/splicing, and mitochondria were found to be profoundly downregulated  
323 in both MYCN depleted cell lines, suggesting a strong activation of these gene  
324 expression programmes by MYCN in WT (Figure 3F).

325 Ribosomal biogenesis was reported to be upregulated in *MYCN*-amplified  
326 neuroblastoma too, and inhibitors of RNA polymerase I (which transcribes

327 ribosomal RNA genes) suppressed MYCN expression and promoted apoptosis of  
328 MNA NB cells, both *in vitro* and *in vivo* (38). Deregulation of splicing (39) and  
329 metabolic reprogramming by MYCN (40) were also observed in neuroblastoma,  
330 consistent with our transcriptomic analysis in WT.

331 To investigate the expression of *MYCN* and its target genes in a large set of  
332 primary Wilms' tumour tissue, we analysed the publicly available WT RNA-seq data  
333 set, TARGET-WT (SRP012006), containing expression data for 124 high-risk  
334 tumours. We found a strong and highly significant, positive correlation between the  
335 expression of *MYCN* and its activated target genes in WT ( $R = 0.43$ ,  $p = 5.6 \times 10^{-7}$ ),  
336 suggesting a regulatory link *in vivo* (Figure 4A). The correlation between *MYCN* and  
337 the newly identified repressed genes in the tumours is less pronounced and does  
338 not reach significance ( $R = -0.15$ ,  $p = 0.087$ ), suggesting that other regulators might  
339 also be involved in repression. For example, *LIN28B* was reported to be activated  
340 via chromosomal translocation and amplification in WT, independent of *MYCN* (41)  
341 and *REST* can be inactivated via mutations. To identify the tumours with a *MYCN*-  
342 regulated signature and study their clinical correlates, we clustered the WT  
343 transcriptomic data set according to the expression of the shared 561 *MYCN* target  
344 genes (Figure 4B). Two clusters were identified: a larger group (cluster 1) with a  
345 mostly uniform expression of target genes and a smaller group of 14 tumours  
346 (cluster 2), displaying up-regulated and down-regulated subsets of our *MYCN* target  
347 genes. The tumours in cluster 2 were generally higher stages, with a significant  
348 difference in distribution (Chi squared test  $p = 0.015$ , Figure 4C). Cluster 1  
349 contained all the stage 1 tumours, and the proportion of stage 2 ones was higher as  
350 well (43% vs. 14%). In contrast, there was a higher proportion of stage 3 and 3B  
351 tumours in cluster 2: 71% vs. 28% and 7% vs. 3%, respectively. Patients with



352 tumours in the MYCN-regulated group (cluster 2) had lower survival (42.9% vs.  
353 61.8%), although this trend did not reach significance probably because of the  
354 relatively low number of patient samples in cluster 2 (Figure 4D).

355 To evaluate the expression of functional gene sets in primary Wilms'  
356 tumours, we assessed the overall expression of GO gene categories highlighted by  
357 our RNA-seq analysis, represented as metagenes, in the newly defined clusters in  
358 TARGET-WT (Figure 4E). Ribosomal genes had a significantly and substantially  
359 higher expression in cluster 2 than cluster 1 ( $p = 3.2 \times 10^{-15}$ ). Genes coding for  
360 mitochondrial protein complexes ( $p = 3.8 \times 10^{-13}$ ) and methylosome components ( $p$   
361  $= 4.7 \times 10^{-8}$ ) were similarly significantly upregulated in cluster 2, reinforcing our data  
362 in WT cell-lines. Together these analyses show that the DEGs we identified in  
363 Wit49 and 17.94 cell-lines correlate with MYCN in primary WTs, and that pathways  
364 identified by our *in vitro* analyses are aberrant in a subset of higher stage WTs.

### 365 **3.3 MYCN upregulates key mitochondrial transporter gene TOMM20,** 366 **overexpressed in blastemal and relapsed WT**

367 Gene set enrichment analysis revealed a profound downregulation of genes  
368 encoding for mitochondrial complexes upon MYCN depletion, in both anaplastic WT  
369 cell-lines (Figure 5A). The most downregulated genes included *TOMM20* (Figure  
370 5B), encoding a member of the translocase of the outer membrane (TOM) complex,  
371 responsible for the import of newly synthesized mitochondrial proteins from the  
372 cytosol. The TOM complex works in close co-operation with the translocase of the  
373 inner membrane (TIM) complex (42), a key member of which, *TIMM50*, was also  
374 downregulated with MYCN depletion. We confirmed the downregulation of these  
375 mitochondrial protein genes together with *PDK1* by qPCR (Figure 5C); PDK1  
376 (Pyruvate Dehydrogenase Kinase 1) is a gatekeeper of the Warburg effect and

377 frequently overexpressed in cancer (43). Downregulation of TOMM20 was also  
378 confirmed at the protein level in both anaplastic WT lines (Figure 5D). In the  
379 TARGET-WT RNA-seq dataset, we observed a significant, positive correlation  
380 between the expression of *MYCN* and *TOMM20*, consistent with our findings  
381 (Figure 5E). *TOMM20* was inferred to be a *MYCN* target gene in neuroblastoma  
382 due to *MYCN* binding to its promoter and its mRNA positively correlating with  
383 *MYCN* (34). However, our data at both protein and RNA levels demonstrate for the  
384 first time that TOMM20 is directly regulated by *MYCN*. In two other, publicly  
385 available transcriptomic data sets by Perlman et al. (44,45), *TOMM20* was found to  
386 be significantly overexpressed in relapsed WT vs. non-relapsed (Figure 5F) and in  
387 blastemal tumours relative to other tumours (Figure 5G). *TOMM20* over-expression  
388 is associated with poor prognosis in other cancers such as colorectal cancer and  
389 chondrosarcoma (46,47), and TOMM20 knockdown in colorectal cancer cells led to  
390 increased mitochondrial damage, significantly reduced ATP production and  
391 apoptosis *in vitro*, and reduced growth of tumour xenografts *in vivo*. Whilst  
392 metabolic defects in WT are not extensively studied, it has been demonstrated that  
393 stromal tumours have markedly reduced mitochondrial mass and function  
394 compared to blastemal tumours, and that oxidative phosphorylation is considerably  
395 lower in WT than normal kidney (48). Taken together with our data, this invokes the  
396 possibility that *MYCN*-regulated over-expression of TOMM20 may alter  
397 mitochondrial protein import by the TOM complex and facilitate the glycolytic switch  
398 (Warburg effect) in poor prognosis WT. In this regard, it is interesting to note that  
399 TOMM20 over-expression has been demonstrated to retard mitochondrial protein  
400 import, presumably by disruption of the normal stoichiometry of subunits of the  
401 import receptor complex (49).

402 **3.4 MYCN upregulates methylosome components in WT and influences post-**  
403 **translational regulation via promoting arginine methylation**

404 The methylosome was one of the most enriched GO categories in our  
405 transcriptomic analysis of MYCN depletion in WT cells, with six out of the 12  
406 members significantly downregulated in both cell-lines. A heatmap of the  
407 methylosome genes shows that the other six members were also downregulated,  
408 albeit to a lesser extent (Figure 6A). Expression changes of *WDR77*, encoding for  
409 MEP50, and *PRMT1* were validated by using qPCR (Figure 6B). Analysis of RNA-  
410 seq data indicated that *PRMT5* was also downregulated in both cell-lines, although  
411 to a lesser extent.

412 Downregulation was confirmed at the protein level for three key  
413 methylosome components: PRMT1, catalysing asymmetrical arginine di-methylation  
414 (ADMA), PRMT5 and WDR77/MEP50, acting in a complex to effect symmetrical  
415 arginine di-methylation (SDMA) modification (Figure 6C). We hypothesized that  
416 such profound downregulation of the methylosome components may influence  
417 global arginine di-methylation levels, which we tested by using antibodies against  
418 ADMA and SDMA modifications. We found that ADMA levels were reduced with  
419 MYCN depletion in both cell-lines by using two different siRNAs. SDMA modification  
420 was also reduced in the 15 - 20 kDa size range, suggesting reduction of SDMA  
421 marks of snRNP proteins, which participate in RNA splicing.

422 Our analyses further established that *PRMT1* and *WDR77* were significantly  
423 overexpressed in WT as compared to fetal kidney in the transcriptomic data set  
424 published by Li et al. (35) (Figure 6D), supporting a role for arginine  
425 methyltransferases in WT pathogenesis. Both *PRMT1* and *WDR77* are MYCN  
426 targets within the MYCN157 geneset for poor prognosis NB (32) and MYCN also

427 binds the *PRMT5* promoter (50). PRMTs are often over-expressed in cancer (51),  
428 and we have previously shown that PRMT5 is a survival factor for MYCN-amplified  
429 NB, with PRMT5 interacting with and methylating MYCN protein (52). We have also  
430 shown that neuroblastoma cells are sensitive to PRMT1 inhibition (53). Small  
431 molecule inhibitors of PRMTs have been developed recently and demonstrated to  
432 have efficacy *in vitro* and *in vivo* against cancers such as mantle cell lymphoma  
433 (54,55) and are currently in clinical trials for solid tumours and various forms of  
434 leukemia (56). Our transcriptomic and protein level analyses suggest that a PRMT-  
435 MYCN axis may also be involved in WT, and that selective inhibition of PRMTs may  
436 represent a novel targeted therapy for poor prognosis WT.

### 437 ***3.5 MYCN represses WT predisposition gene REST, leading to activation of its*** 438 ***target genes***

439 Exome sequencing of familial and non-familial Wilms' tumors recently  
440 revealed loss of function mutations in the *REST* gene (encoding RE1 Silencing  
441 Transcription Factor) (10). REST is a Krüppel-type zinc-finger transcription factor  
442 which acts as a repressor of gene transcription via numerous interactions with  
443 chromatin-modifiers, and deregulation of REST is implicated in the pathogenesis of  
444 several diseases, including cancer (57). Intriguingly, our RNA-seq revealed *REST*  
445 as one of the genes upregulated upon depletion of MYCN. De-repression of REST  
446 was also confirmed at the protein level in both cell-lines using two different siRNAs  
447 (Figure 7A). Furthermore, we found that the REST-repressed target genes *STMN3*,  
448 *GDAP1* and *ENAH* were decreased after MYCN knockdown, consistent with the  
449 upregulation of functional REST protein (Figure 7B). To query the effect of MYCN  
450 on REST-regulated genes in WT, we performed GSEA on our MYCN depletion  
451 transcriptomic data using gene signatures established in stem cell-derived neurons

452 (58) and embryonic stem cells (ESC) (59) (Figure 7C). Both gene sets were  
453 significantly downregulated in both WT cell-lines upon MYCN knockdown,  
454 suggesting a MYCN - REST regulatory axis in WT.

455 *REST* was found to be significantly repressed in cluster 2 of the TARGET –  
456 WT data set (Figure 7D), which contained tumours with MYCN signature. In  
457 contrast, ESC-specific REST target genes were derepressed in the same group of  
458 tumours, as indicated by the expression of REST target metagene, representing  
459 overall expression of MYCN regulated REST genes of the signature described by  
460 Johnson et al. (59) (Figure 7E). We also found *REST* significantly repressed in WT  
461 as compared to fetal kidney in our cohort of primary samples (Figure 7F).

462 Expression of *MYCN* and *REST* showed a strong, inverse correlation in these  
463 tissues ( $R = -0.73$ ,  $p = 0.0003$ ) (Figure 7G). Thus our data identifies the repression  
464 of the presumptive WT tumour suppressor gene *REST* as a hitherto  
465 uncharacterised oncogenic pathway downstream of MYCN deregulation.

466 Taken together, this study demonstrates that MYCN promotes growth and  
467 survival in WT via regulating multiple genes affecting splicing, translation, post-  
468 translational modification, microRNAs, metabolism and cellular differentiation  
469 (Figure 8). The intersection of MYCN with co-operative oncogenic and tumour  
470 suppressor pathways represent possible vulnerabilities of poor-prognosis Wilms'  
471 tumour which can be exploited in the future for urgently required targeted  
472 therapeutics.

473

474 **Legends**

475 **Figure 1. Immunohistochemistry in fetal kidney and Wilms' tumours reveals a**  
476 **blastemal expression for MYCN protein in tumours.**

477 MYCN expression was detected in the distal tubules (Dt) in 13-weeks-old fetal  
478 kidney, while the blastema (Bl), stroma (St) and proximal tubules (Pt) were  
479 negative. Blastemal-rich WT showed positivity in the blastemal component.  
480 Epithelial and stromal structures did not show any expression of MYCN protein. A  
481 table summarizing positive MYCN staining in the nucleus or the cytoplasm only in  
482 WT, according to histology, is shown underneath.

483 **Figure 2. MYCN depletion leads to significant growth inhibition in anaplastic**  
484 **WT cell-lines.**

485 **(A)** MYCN depletion resulted in significant growth suppression after 120 hours  
486 treatment in Wit49, but not in an increase in dead cells, using two different siRNAs.  
487 (n = 3, \*\*\* p < 0.01, two-tailed T-tests). **(B)** MYCN knockdown also led to significant  
488 growth suppression in 17.94 cells after 120 hours (n = 3). Western blot was used to  
489 confirm knockdown of MYCN in both cell-lines.

490 **Figure 3. Genes and pathways identified by RNA-seq in MYCN-depleted**  
491 **anaplastic WT cells.**

492 **(A)** Venn diagrams showing highly significant overlaps between differentially  
493 expressed genes (DEGs) in Wit49 and 17.94 after MYCN depletion for 48 hours, for  
494 up- and downregulated genes, respectively. DEGs were determined as statistically  
495 significant (p < 0.05) and having a minimum shrunk fold change, a conservative  
496 corrected value, of 1.2, calculated by using DESEQ2. The probability values for  
497 shared genes is indicated. **(B)** Heatmap of shared 561 DEGs in Wit49 and 17.94.  
498 Examples of known MYCN target genes are shown in black, while genes

499 associated with kidney development or Wilms' tumour predisposition are highlighted  
500 in green. **(C)** Validation of identified, select MYCN-regulated genes in WT cells by  
501 qPCR, 48 hours after MYCN knockdown. A representative of three biological  
502 replicates is shown. Significance was calculated based on the biological replicates  
503 (\*  $p < 0.05$ , T-tests). **(D)** Venn diagram showing overlaps of MYCN-regulated genes  
504 in WT, described in this study, with MYCN target genes identified in neuroblastoma.  
505 **(E)** GSEA plots showing upregulation of gene signatures repressed in WT as  
506 compared to FK, upon depletion of MYCN. MYCN-activated genes of the MYCN157  
507 signature, identified in NB, were downregulated. Examples of GSEA of  
508 downregulated GO gene sets associated with ribosomal and mitochondrial function  
509 and splicing in MYCN depleted WT cells. **(F)** Volcano plots of Gene Set Enrichment  
510 Analysis on MYCN depletion transcriptomes in WT cells. Normalized enrichment  
511 scores and False discovery rates (FDR) were calculated using Gene Ontology gene  
512 categories indicated universal downregulation of gene sets linked to ribosomal and  
513 mitochondrial function as well as those associated with RNA processing and  
514 splicing. Scores of all gene sets are shown in grey, while those of statistically  
515 significant gene sets ( $FDR < 0.05$ ) in the highlighted, functional categories are  
516 indicated according to the legend.

517 **Figure 4. Meta-analysis of MYCN regulated genes in the WT TARGET data set**  
518 **identifies distinct patient clusters.**

519 **(A)** Overall expression of MYCN activated genes, identified as shared  
520 downregulated hits in MYCN depleted WT cells, showed a strong and significant  
521 positive correlation with MYCN expression in the TARGET-WT data set  
522 (SRP012006), containing transcriptomic data of 124 high-risk WT. Overall  
523 expression of MYCN repressed genes displayed a modest, inverse correlation that

524 did not reach significance. **(B)** K means clustering (K = 2) performed on TARGET-  
525 WT data set based on the expression of 561 MYCN regulated genes in WT,  
526 identified in this study. Clinical information is shown as coloured bars on the top:  
527 stage (red = 1, green = 2, blue = 3, magenta = 3b, light green = 4, yellow = 5\_3B,  
528 turquoise = 5\_4); event type (none = red, blue = relapse, green = progression); vital  
529 status (green = alive, red = dead) and reason for death (green = none, yellow =  
530 tumour, red = infection, blue = toxicity, magenta = tumour and toxicity). **(C)**  
531 Proportion of tumours with various clinical stages. Chi-square test showed that the  
532 association of clinical stages with clustering according to MYCN-regulated genes is  
533 significant. Stages represented by a single tumour were omitted. **(D)** More death  
534 occurred in patients with tumours in cluster 2, however this association did not  
535 reach significance. **(E)** Overall expression of ribosome genes, mitochondrial protein  
536 complexes and methylosome components was significantly higher in cluster 2  
537 tumours as compared to those in cluster 1 (ANOVA).

538 **Figure 5. MYCN regulates *TOMM20* and other mitochondrial function genes.**

539 **(A)** GSEA showing downregulation of genes encoding for mitochondrial protein  
540 complexes with MYCN depletion. **(B)** Heatmap displaying the expression of the top  
541 20 genes in the leading edge of the GO mitochondrial protein complex gene  
542 category in MYCN depleted in WT cells. **(C)** Validation of select mitochondrial  
543 genes in Wit49 and 17.94 cells by qPCR, 48 hours after MYCN knockdown. A  
544 representative of three biological replicates are shown. T-tests were performed on  
545 the biological replicates (\* p < 0.05). **(D)** Western blot and quantification showing  
546 reduction of TOMM20 protein expression after 72 hours of MYCN depletion. (n = 3).  
547 **(E)** Expression of *MYCN* and *TOMM20* genes significantly correlated in the  
548 TARGET-WT data set (SRP012006). **(F)** Relapsed WT had significantly higher



549 expression of *TOMM20* mRNA than non-relapsed ones, as detected in GSE10320.

550 **(G)** *TOMM20* was also more highly expressed in blastemal WT than in tumours with

551 other histology (GSE31403).

552 **Figure 6. MYCN activates methylosome genes in WT.**

553 **(A)** Heatmap of genes encoding for methylosome components, showing expression

554 in MYCN-depleted WT cells. Genes highlighted in black were identified in this study

555 as significantly and substantially regulated by MYCN in two anaplastic WT cells. **(B)**

556 Validation of select methylosome genes in WT cells by qPCR, 48 hours after MYCN

557 knockdown. Statistical significance was calculated based on biological replicates

558 and expression for one representative is shown (\*  $p < 0.05$ ). **(C)** Western blot of

559 select methylosome components in WT cells 72 hours after MYCN knock-down with

560 two different siRNAs ( $n = 3$ ). Protein expression was calculated based on

561 densitometry and normalized for the loading control on the same filter. Confirmation

562 of MYCN depletion is shown in Figure 5D. **(D)** *PRMT1* and **(E)** *WDR77*, encoding

563 for MEP50, were shown to be expressed at significantly higher levels in WT than in

564 fetal kidney (GSE6120).

565 **Figure 7. MYCN represses the WT predisposition gene *REST*.**

566 **(A)** *REST* protein is derepressed upon MYCN depletion ( $n = 3$ ). Protein expression

567 was calculated based on densitometry and normalized for loading control. **(B)**

568 Validation of upregulation of *REST* mRNA and downregulation of its target genes by

569 qPCR after MYCN depletion for 48 hours ( $n = 3$ ). A representative experiment is

570 shown. T-tests were performed on biological replicates (\*  $p < 0.05$ ). **(C)** GSEA

571 showed downregulation of *REST* target genes with MYCN depletion. **(D)** *REST* has

572 a significantly lower expression in cluster 2 tumours in TARGET-WT data set

573 (SRP012006) as compared to cluster 1 (ANOVA). **(E)** *REST* target genes, showing

574 a significant overall overexpression in cluster 2 WT as compared to cluster 1.  
575 (ANOVA) **(F)** *REST* was found to be significantly repressed in WT as compared to  
576 FK by qPCR, as assessed by T-test. **(E)** Expression of *MYCN* and *REST* highly and  
577 significantly correlated in WT and FK, indicated by red and blue dots, respectively.

578 **Figure 8. Model depicting select Wilms' tumour MYCN targets with potential**  
579 **functional consequences.**

580 MYCN represses the *REST* tumour suppressor gene, which can result in activation  
581 of REST-repressed genes. *ROBO1* is also repressed, which may compromise the  
582 differentiation of the condensing mesenchyme (CM) into pre-tubular aggregates  
583 (PTA) via inhibition of SLIT-ROBO developmental signalling. The ureteric bud (UB)  
584 is also shown. MYCN activation of methylome genes such as PRMTs alters  
585 arginine methylation (R-Me), with subsequent alterations in functions including  
586 mRNA splicing and protein stability. Activation of *TOMM20* by MYCN may lead to  
587 aberrant mitochondrial protein translocation (dashed red arrow) and altered tumour  
588 cell metabolism.

589 **Supplementary figure 1. MYCN immunohistochemistry in adult human kidney.**

590 MYCN protein is absent in fully differentiated and developed kidney.

591 **Supplementary figure 2. Cell cycle analysis.**

592 Depletion of MYCN protein in Wit49 cells by two different siRNAs for 72 hours  
593 resulted in a significant increase in the proportion of cells in G2/M phase and a  
594 decrease in S phase (n = 3, \*\*\* p < 0.01, T-test). No change was observed in the  
595 subG1 fraction. MYCN knock-down was confirmed by using Western blot. MYCN  
596 knock-down for Wit49 is also shown in Figure 7A.

597 **Supplementary figure 3. Western blots of MYCN and LIN28B and GSEA of**  
598 **differentiation gene signatures in WT.**

599 **(A)** Confirmation of MYCN depletion in samples used for RNA-seq. **(B)** Western blot  
600 showing downregulation of LIN28B protein after MYCN depletion for 72H in WT  
601 cells. Blots of confirmation of MYCN knock-down are shown in Figure 7A for Wit49  
602 and Figure 5D for 17.94. **(C)** GSEA showed upregulation of kidney developmental  
603 gene sets in MYCN-depleted WT cells. **(D)** Single cell signatures of differentiated  
604 cell types in the fetal kidney were upregulated, while genes associated with  
605 proliferating cells were down in MYCN knock-down WT cells.

606 **Supplementary figure 4. GSEA analysis in transcriptomes of MYCN-depleted**  
607 **WT cells.**

608 **(A)** Genes overexpressed in WT vs. fetal kidney were mostly downregulated. **(B)**  
609 GSEA showed downregulation of MYC/MYCN gene sets. **(C)** GSEA highlighted  
610 downregulation of gene sets associated with RNA export from the nucleus and  
611 upregulation of unfolded protein response genes.

612 **Supplementary table 1. Oligonucleotides**

613 **Supplementary table 2. Antibodies**

614 **Supplementary table 3. Shared MYCN-regulated genes in Wit49 and 17.94.**

615 **Supplementary table 4. Gene Ontology analysis of MYCN-regulated genes in**  
616 **Wilms' tumour.**

617 **Author Contributions:** Marianna Szemes: Conceptualization, Methodology, Formal  
618 analysis, Investigation, Validation, Data curation, Writing: Original draft, review and  
619 editing, Visualization, Supervision. Zsombor Melegh: Formal analysis, Investigation,  
620 Validation. Jacob Bellamy, Ji Hyun Park, Biyao Chen: Investigation, Validation.

621 Alexander Greenhough: Visualization. Daniel Catchpoole: Resources. Karim Malik:  
622 Conceptualization, Methodology, Formal analysis, Investigation, Resources, Funding  
623 acquisition, Supervision, Project administration, Writing: Original draft, review and  
624 editing, Visualization.

625 **Funding:** We would like to thank the Children's Cancer and Leukaemia Group  
626 (CCLGA 2017 01; CCLGA 2019 16), the Biotechnology and Biological Sciences  
627 Research Council (BB/P008232/1) and the Showering Fund for funding this study.

628 **Acknowledgments:** We wish to thank Prof. Herman Yeger (University of Toronto)  
629 and Dr. Keith Brown (University of Bristol) for kindly sharing the WT cell-lines, Wit49  
630 and 17.94, respectively. We also would like to thank Drs. Jane Coghill and Christy  
631 Waterfall at the University of Bristol Genomics Facility for assistance with  
632 transcriptomics and Dr. Andy Herman for help with flow cytometry. We greatly  
633 indebted to Ms Aysen Yuksei and Dr Michael Krivanek for construction of the tissue  
634 microarrays and reviewing pathology data.

635 **Conflicts of Interest:** The authors declare no conflict of interest. The funders had no  
636 role in the design of the study; in the collection, analyses, or interpretation of data; in  
637 the writing of the manuscript, or in the decision to publish the results".

638

## 639 References

- 640 1. Green, D.M. (1997) Wilms' tumour. *Eur J Cancer*, **33**, 409-418; discussion  
641 419-420.
- 642 2. Cotton, C.A., Peterson, S., Norkool, P.A., Takashima, J., Grigoriev, Y.,  
643 Green, D.M. and Breslow, N.E. (2009) Early and late mortality after diagnosis  
644 of wilms tumor. *Journal of clinical oncology : official journal of the American*  
645 *Society of Clinical Oncology*, **27**, 1304-1309.
- 646 3. Pelletier, J., Bruening, W., Li, F.P., Haber, D.A., Glaser, T. and Housman,  
647 D.E. (1991) WT1 mutations contribute to abnormal genital system  
648 development and hereditary Wilms' tumour. *Nature*, **353**, 431-434.
- 649 4. Pritchard-Jones, K., Fleming, S., Davidson, D., Bickmore, W., Porteous, D.,  
650 Gosden, C., Bard, J., Buckler, A., Pelletier, J., Housman, D. *et al.* (1990) The  
651 candidate Wilms' tumour gene is involved in genitourinary development.  
652 *Nature*, **346**, 194-197.
- 653 5. Bardeesy, N., Falkoff, D., Petruzzi, M.J., Nowak, N., Zabel, B., Adam, M.,  
654 Aguiar, M.C., Grundy, P., Shows, T. and Pelletier, J. (1994) Anaplastic  
655 Wilms' tumour, a subtype displaying poor prognosis, harbours p53 gene  
656 mutations. *Nature genetics*, **7**, 91-97.
- 657 6. Koesters, R., Ridder, R., Kopp-Schneider, A., Betts, D., Adams, V., Niggli, F.,  
658 Briner, J. and von Knebel Doeberitz, M. (1999) Mutational activation of the  
659 beta-catenin proto-oncogene is a common event in the development of  
660 Wilms' tumors. *Cancer Res*, **59**, 3880-3882.
- 661 7. Torrezan, G.T., Ferreira, E.N., Nakahata, A.M., Barros, B.D., Castro, M.T.,  
662 Correa, B.R., Krepischi, A.C., Olivieri, E.H., Cunha, I.W., Tabori, U. *et al.*  
663 (2014) Recurrent somatic mutation in DROSHA induces microRNA profile  
664 changes in Wilms tumour. *Nature communications*, **5**, 4039.
- 665 8. Rakheja, D., Chen, K.S., Liu, Y., Shukla, A.A., Schmid, V., Chang, T.C.,  
666 Khokhar, S., Wickiser, J.E., Karandikar, N.J., Malter, J.S. *et al.* (2014)  
667 Somatic mutations in DROSHA and DICER1 impair microRNA biogenesis  
668 through distinct mechanisms in Wilms tumours. *Nat Commun*, **2**, 4802.
- 669 9. Wegert, J., Ishaque, N., Vardapour, R., Georg, C., Gu, Z., Bieg, M., Ziegler,  
670 B., Bausenwein, S., Nourkami, N., Ludwig, N. *et al.* (2015) Mutations in the  
671 SIX1/2 Pathway and the DROSHA/DGCR8 miRNA Microprocessor Complex  
672 Underlie High-Risk Blastemal Type Wilms Tumors. *Cancer cell*, **27**, 298-311.
- 673 10. Mahamdallie, S.S., Hanks, S., Karlin, K.L., Zachariou, A., Perdeaux, E.R.,  
674 Ruark, E., Shaw, C.A., Renwick, A., Ramsay, E., Yost, S. *et al.* (2015)  
675 Mutations in the transcriptional repressor REST predispose to Wilms tumor.  
676 *Nature genetics*, **47**, 1471-1474.
- 677 11. Williams, R.D., Al-Saadi, R., Chagtai, T., Popov, S., Messahel, B., Sebire, N.,  
678 Gessler, M., Wegert, J., Graf, N., Leuschner, I. *et al.* (2010) Subtype-specific  
679 FBXW7 mutation and MYCN copy number gain in Wilms' tumor. *Clinical*  
680 *cancer research : an official journal of the American Association for Cancer*  
681 *Research*, **16**, 2036-2045.
- 682 12. Williams, R.D., Al-Saadi, R., Natrajan, R., Mackay, A., Chagtai, T., Little, S.,  
683 Hing, S.N., Fenwick, K., Ashworth, A., Grundy, P. *et al.* (2011) Molecular  
684 profiling reveals frequent gain of MYCN and anaplasia-specific loss of 4q and  
685 14q in Wilms tumor. *Genes, chromosomes & cancer*, **50**, 982-995.

- 686 13. Shaw, A.P., Poirier, V., Tyler, S., Mott, M., Berry, J. and Maitland, N.J. (1988)  
687 Expression of the N-myc oncogene in Wilms' tumour and related tissues.  
688 *Oncogene*, **3**, 143-149.
- 689 14. Zirn, B., Hartmann, O., Samans, B., Krause, M., Wittmann, S., Mertens, F.,  
690 Graf, N., Eilers, M. and Gessler, M. (2006) Expression profiling of Wilms  
691 tumors reveals new candidate genes for different clinical parameters.  
692 *International journal of cancer. Journal international du cancer*, **118**, 1954-  
693 1962.
- 694 15. Wittmann, S., Wunder, C., Zirn, B., Furtwangler, R., Wegert, J., Graf, N. and  
695 Gessler, M. (2008) New prognostic markers revealed by evaluation of genes  
696 correlated with clinical parameters in Wilms tumors. *Genes, chromosomes &*  
697 *cancer*, **47**, 386-395.
- 698 16. Bates, C.M., Kharzai, S., Erwin, T., Rossant, J. and Parada, L.F. (2000) Role  
699 of N-myc in the developing mouse kidney. *Developmental biology*, **222**, 317-  
700 325.
- 701 17. Huang, M. and Weiss, W.A. (2013) Neuroblastoma and MYCN. *Cold Spring*  
702 *Harbor perspectives in medicine*, **3**, a014415.
- 703 18. Alami, J., Williams, B.R. and Yeger, H. (2003) Derivation and  
704 characterization of a Wilms' tumour cell line, WiT 49. *Int J Cancer*, **107**, 365-  
705 374.
- 706 19. Brown, K.W., Charles, A., Dallosso, A., White, G., Charlet, J., Standen, G.R.  
707 and Malik, K. (2012) Characterization of 17.94, a novel anaplastic Wilms'  
708 tumor cell line. *Cancer Genet*, **205**, 319-326.
- 709 20. Williams, R.D., Chagtai, T., Alcaide-German, M., Apps, J., Wegert, J., Popov,  
710 S., Vujanic, G., van Tinteren, H., van den Heuvel-Eibrink, M.M., Kool, M. *et*  
711 *al.* (2015) Multiple mechanisms of MYCN dysregulation in Wilms tumour.  
712 *Oncotarget*, **6**, 7232-7243.
- 713 21. Beckers, A., Van Peer, G., Carter, D.R., Gartlgruber, M., Herrmann, C.,  
714 Agarwal, S., Helmsmoortel, H.H., Althoff, K., Molenaar, J.J., Cheung, B.B. *et*  
715 *al.* (2015) MYCN-driven regulatory mechanisms controlling LIN28B in  
716 neuroblastoma. *Cancer Lett*, **366**, 123-132.
- 717 22. Urbach, A., Yermalovich, A., Zhang, J., Spina, C.S., Zhu, H., Perez-Atayde,  
718 A.R., Shukrun, R., Charlton, J., Sebire, N., Mifsud, W. *et al.* (2014) Lin28  
719 sustains early renal progenitors and induces Wilms tumor. *Genes Dev*, **28**,  
720 971-982.
- 721 23. Yermalovich, A.V., Osborne, J.K., Sousa, P., Han, A., Kinney, M.A., Chen,  
722 M.J., Robinton, D.A., Montie, H., Pearson, D.S., Wilson, S.B. *et al.* (2019)  
723 Lin28 and let-7 regulate the timing of cessation of murine nephrogenesis.  
724 *Nature communications*, **10**, 168.
- 725 24. Tsalikas, J. and Romer-Seibert, J. (2015) LIN28: roles and regulation in  
726 development and beyond. *Development*, **142**, 2397-2404.
- 727 25. Blockus, H. and Chedotal, A. (2016) Slit-Robo signaling. *Development*, **143**,  
728 3037-3044.
- 729 26. Xian, J., Aitchison, A., Bobrow, L., Corbett, G., Pannell, R., Rabbitts, T. and  
730 Rabbitts, P. (2004) Targeted disruption of the 3p12 gene, Dutt1/Robo1,  
731 predisposes mice to lung adenocarcinomas and lymphomas with methylation  
732 of the gene promoter. *Cancer Res*, **64**, 6432-6437.
- 733 27. Grieshammer, U., Le, M., Plump, A.S., Wang, F., Tessier-Lavigne, M. and  
734 Martin, G.R. (2004) SLIT2-mediated ROBO2 signaling restricts kidney  
735 induction to a single site. *Dev Cell*, **6**, 709-717.

- 736 28. Piper, M., Georgas, K., Yamada, T. and Little, M. (2000) Expression of the  
737 vertebrate Slit gene family and their putative receptors, the Robo genes, in  
738 the developing murine kidney. *Mech Dev*, **94**, 213-217.
- 739 29. Astuti, D., Da Silva, N.F., Dallol, A., Gentle, D., Martinsson, T., Kogner, P.,  
740 Grundy, R., Kishida, T., Yao, M., Latif, F. *et al.* (2004) SLIT2 promoter  
741 methylation analysis in neuroblastoma, Wilms' tumour and renal cell  
742 carcinoma. *Br J Cancer*, **90**, 515-521.
- 743 30. Menon, R., Otto, E.A., Kokoruda, A., Zhou, J., Zhang, Z., Yoon, E., Chen,  
744 Y.C., Troyanskaya, O., Spence, J.R., Kretzler, M. *et al.* (2018) Single-cell  
745 analysis of progenitor cell dynamics and lineage specification in the human  
746 fetal kidney. *Development*, **145**.
- 747 31. Fan, R., Grignon, D., Gulcicek, E.E., Faught, P. and Cheng, L. (2011)  
748 Proteomic studies of Anaplasia in Wilms Tumor. *Proteomics Insights*, **4**.
- 749 32. Valentijn, L.J., Koster, J., Haneveld, F., Aissa, R.A., van Sluis, P.,  
750 Broekmans, M.E., Molenaar, J.J., van Nes, J. and Versteeg, R. (2012)  
751 Functional MYCN signature predicts outcome of neuroblastoma irrespective  
752 of MYCN amplification. *Proc Natl Acad Sci U S A*, **109**, 19190-19195.
- 753 33. Boon, K., Caron, H.N., van Asperen, R., Valentijn, L., Hermus, M.C., van  
754 Sluis, P., Roobeek, I., Weis, I., Voute, P.A., Schwab, M. *et al.* (2001) N-myc  
755 enhances the expression of a large set of genes functioning in ribosome  
756 biogenesis and protein synthesis. *EMBO J*, **20**, 1383-1393.
- 757 34. Hsu, C.L., Chang, H.Y., Chang, J.Y., Hsu, W.M., Huang, H.C. and Juan, H.F.  
758 (2016) Unveiling MYCN regulatory networks in neuroblastoma via integrative  
759 analysis of heterogeneous genomics data. *Oncotarget*, **7**, 36293-36310.
- 760 35. Li, C.M., Kim, C.E., Margolin, A.A., Guo, M., Zhu, J., Mason, J.M., Hensle,  
761 T.W., Murty, V.V., Grundy, P.E., Fearon, E.R. *et al.* (2004) CTNNB1  
762 mutations and overexpression of Wnt/beta-catenin target genes in WT1-  
763 mutant Wilms' tumors. *Am J Pathol*, **165**, 1943-1953.
- 764 36. Liberzon, A., Birger, C., Thorvaldsdottir, H., Ghandi, M., Mesirov, J.P. and  
765 Tamayo, P. (2015) The Molecular Signatures Database (MSigDB) hallmark  
766 gene set collection. *Cell Syst*, **1**, 417-425.
- 767 37. Montemurro, L., Raieli, S., Angelucci, S., Bartolucci, D., Amadesi, C.,  
768 Lampis, S., Scardovi, A.L., Venturelli, L., Nieddu, G., Cerisoli, L. *et al.* (2019)  
769 A Novel MYCN-Specific Antigen Oligonucleotide Deregulates Mitochondria  
770 and Inhibits Tumor Growth in MYCN-Amplified Neuroblastoma. *Cancer Res*,  
771 **79**, 6166-6177.
- 772 38. Hald, O.H., Olsen, L., Gallo-Oller, G., Elfman, L.H.M., Lokke, C., Kogner, P.,  
773 Sveinbjornsson, B., Flaegstad, T., Johnsen, J.I. and Einvik, C. (2019)  
774 Inhibitors of ribosome biogenesis repress the growth of MYCN-amplified  
775 neuroblastoma. *Oncogene*, **38**, 2800-2813.
- 776 39. Zhang, S., Wei, J.S., Li, S.Q., Badgett, T.C., Song, Y.K., Agarwal, S., Coarfa,  
777 C., Tolman, C., Hurd, L., Liao, H. *et al.* (2016) MYCN controls an alternative  
778 RNA splicing program in high-risk metastatic neuroblastoma. *Cancer Lett*,  
779 **371**, 214-224.
- 780 40. Oliynyk, G., Ruiz-Perez, M.V., Sainero-Alcolado, L., Dzieran, J., Zirath, H.,  
781 Gallart-Ayala, H., Wheelock, C.E., Johansson, H.J., Nilsson, R., Lehtio, J. *et al.* (2019) MYCN-enhanced Oxidative and Glycolytic Metabolism Reveals  
782 Vulnerabilities for Targeting Neuroblastoma. *iScience*, **21**, 188-204.
- 783 41. Viswanathan, S.R., Powers, J.T., Einhorn, W., Hoshida, Y., Ng, T.L.,  
784 Toffanin, S., O'Sullivan, M., Lu, J., Phillips, L.A., Lockhart, V.L. *et al.* (2009)  
785

- 786 Lin28 promotes transformation and is associated with advanced human  
787 malignancies. *Nat Genet*, **41**, 843-848.
- 788 42. Pfanner, N. and Meijer, M. (1997) The Tom and Tim machine. *Curr Biol*, **7**,  
789 R100-103.
- 790 43. Dang, C.V., Le, A. and Gao, P. (2009) MYC-induced cancer cell energy  
791 metabolism and therapeutic opportunities. *Clin Cancer Res*, **15**, 6479-6483.
- 792 44. Huang, C.C., Gadd, S., Breslow, N., Cutcliffe, C., Sredni, S.T., Helenowski,  
793 I.B., Dome, J.S., Grundy, P.E., Green, D.M., Fritsch, M.K. *et al.* (2009)  
794 Predicting relapse in favorable histology Wilms tumor using gene expression  
795 analysis: a report from the Renal Tumor Committee of the Children's  
796 Oncology Group. *Clin Cancer Res*, **15**, 1770-1778.
- 797 45. Gadd, S., Huff, V., Huang, C.C., Ruteshouser, E.C., Dome, J.S., Grundy,  
798 P.E., Breslow, N., Jennings, L., Green, D.M., Beckwith, J.B. *et al.* (2012)  
799 Clinically relevant subsets identified by gene expression patterns support a  
800 revised ontogenic model of Wilms tumor: a Children's Oncology Group  
801 Study. *Neoplasia*, **14**, 742-756.
- 802 46. Park, S.H., Lee, A.R., Choi, K., Joung, S., Yoon, J.B. and Kim, S. (2019)  
803 TOMM20 as a potential therapeutic target of colorectal cancer. *BMB Rep*,  
804 **52**, 712-717.
- 805 47. Roche, M.E., Lin, Z., Whitaker-Menezes, D., Zhan, T., Szuhai, K., Bovee, J.,  
806 Abraham, J.A., Jiang, W., Martinez-Outschoorn, U. and Basu-Mallick, A.  
807 (2020) Translocase of the outer mitochondrial membrane complex subunit 20  
808 (TOMM20) facilitates cancer aggressiveness and therapeutic resistance in  
809 chondrosarcoma. *Biochim Biophys Acta Mol Basis Dis*, **1866**, 165962.
- 810 48. Feichtinger, R.G., Neureiter, D., Royer-Pokora, B., Mayr, J.A., Zimmermann,  
811 F.A., Jones, N., Kogler, C., Ratschek, M., Sperl, W. and Kofler, B. (2011)  
812 Heterogeneity of mitochondrial energy metabolism in classical triphasic  
813 Wilms' tumor. *Front Biosci (Elite Ed)*, **3**, 187-193.
- 814 49. Terada, K., Kanazawa, M., Yano, M., Hanson, B., Hoogenraad, N. and Mori,  
815 M. (1997) Participation of the import receptor Tom20 in protein import into  
816 mammalian mitochondria: analyses in vitro and in cultured cells. *FEBS Lett*,  
817 **403**, 309-312.
- 818 50. Westermann, F., Muth, D., Benner, A., Bauer, T., Henrich, K.O., Oberthuer,  
819 A., Brors, B., Beissbarth, T., Vandesompele, J., Pattyn, F. *et al.* (2008)  
820 Distinct transcriptional MYCN/c-MYC activities are associated with  
821 spontaneous regression or malignant progression in neuroblastomas.  
822 *Genome Biol*, **9**, R150.
- 823 51. Yang, Y. and Bedford, M.T. (2013) Protein arginine methyltransferases and  
824 cancer. *Nat Rev Cancer*, **13**, 37-50.
- 825 52. Park, J.H., Szemes, M., Vieira, G.C., Melegh, Z., Malik, S., Heesom, K.J.,  
826 Von Wallwitz-Freitas, L., Greenhough, A., Brown, K.W., Zheng, Y.G. *et al.*  
827 (2015) Protein arginine methyltransferase 5 is a key regulator of the MYCN  
828 oncoprotein in neuroblastoma cells. *Mol Oncol*, **9**, 617-627.
- 829 53. Hua, Z.Y., Hansen, J.N., He, M., Dai, S.K., Choi, Y., Fulton, M.D., Lloyd,  
830 S.M., Szemes, M., Sen, J., Ding, H.F. *et al.* (2020) PRMT1 promotes  
831 neuroblastoma cell survival through ATF5. *Oncogenesis*, **9**, 50.
- 832 54. Chan-Penebre, E., Kuplast, K.G., Majer, C.R., Boriack-Sjodin, P.A., Wigle,  
833 T.J., Johnston, L.D., Rioux, N., Munchhof, M.J., Jin, L., Jacques, S.L. *et al.*  
834 (2015) A selective inhibitor of PRMT5 with in vivo and in vitro potency in MCL  
835 models. *Nat Chem Biol*, **11**, 432-437.



- 836 55. Fedoriw, A., Rajapurkar, S.R., O'Brien, S., Gerhart, S.V., Mitchell, L.H.,  
837 Adams, N.D., Rioux, N., Lingaraj, T., Ribich, S.A., Pappalardi, M.B. *et al.*  
838 (2019) Anti-tumor Activity of the Type I PRMT Inhibitor, GSK3368715,  
839 Synergizes with PRMT5 Inhibition through MTAP Loss. *Cancer cell*, **36**, 100-  
840 114 e125.
- 841 56. Siu, L.L., Rasco, D.W., Vinay, S.P., Romano, P.M., Menis, J., Opdam, F.L.,  
842 Heinhuis, K.M., Egger, J.L., Gorman, S.A., Parasrampur, R. *et al.* (2019)  
843 METEOR-1: A phase I study of GSK3326595, a first-in-class protein arginine  
844 methyltransferase 5 (PRMT5) inhibitor, in advanced solid tumours. *Annals of*  
845 *Oncology*, **30**.
- 846 57. Ooi, L. and Wood, I.C. (2007) Chromatin crosstalk in development and  
847 disease: lessons from REST. *Nat Rev Genet*, **8**, 544-554.
- 848 58. Satoh, J., Kawana, N. and Yamamoto, Y. (2013) ChIP-Seq Data Mining:  
849 Remarkable Differences in NRSF/REST Target Genes between Human ESC  
850 and ESC-Derived Neurons. *Bioinform Biol Insights*, **7**, 357-368.
- 851 59. Johnson, R., Teh, C.H., Kunarso, G., Wong, K.Y., Srinivasan, G., Cooper,  
852 M.L., Volta, M., Chan, S.S., Lipovich, L., Pollard, S.M. *et al.* (2008) REST  
853 regulates distinct transcriptional networks in embryonic and neural stem  
854 cells. *PLoS Biol*, **6**, e256.  
855

**FK**

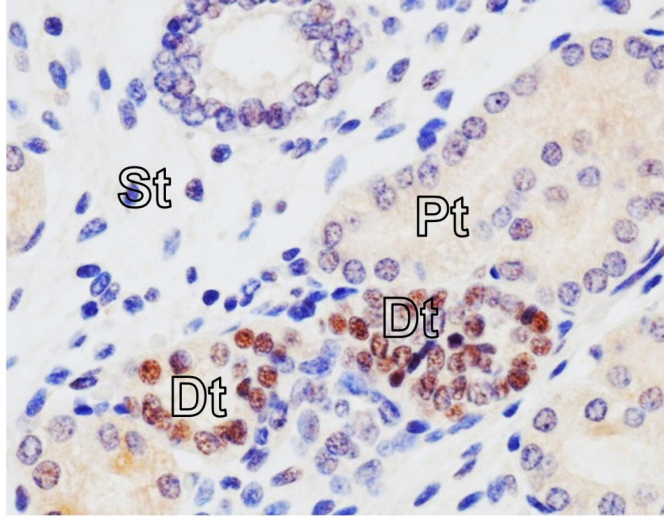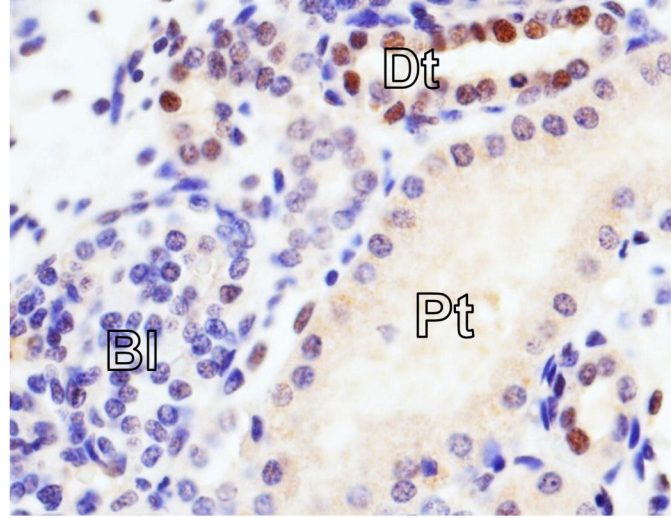

**Blastemal-rich**

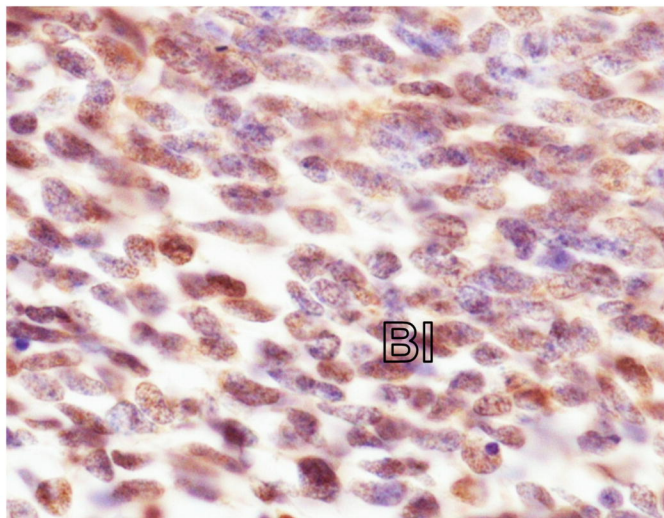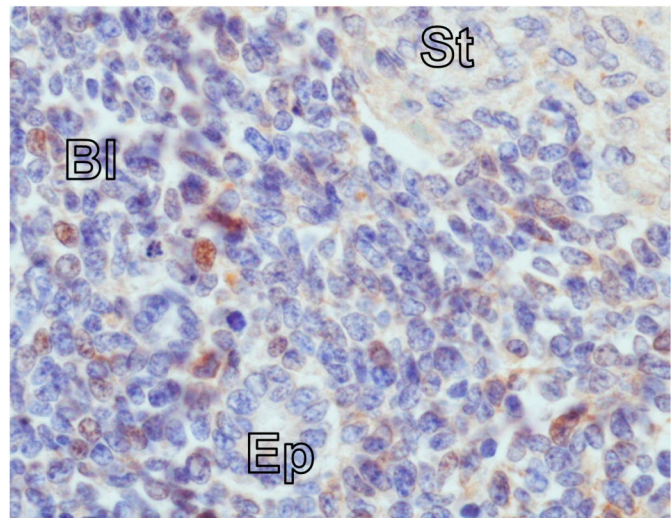

**Epithelial/stromal**

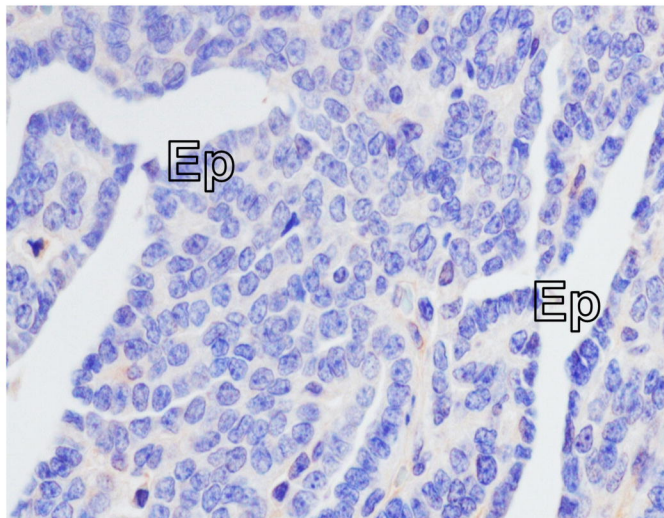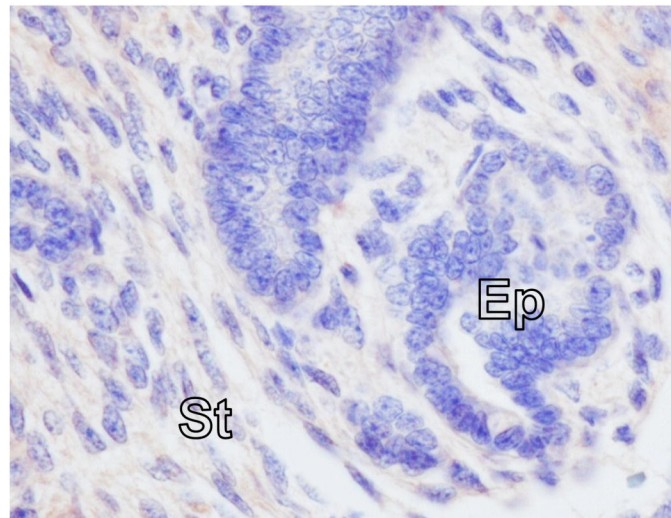

| Pre-treatment | Nuclear + | Cyto only+ | Neg       | Total     |
|---------------|-----------|------------|-----------|-----------|
| Triphasic WT  | 7         | 3          | 12        | 22        |
| Blastemal WT  | 2         |            | 3         | 5         |
| Epithelial WT |           |            | 1         | 1         |
| Blastemal and | 1         |            |           | 1         |
| Blastemal and |           |            | 1         | 1         |
| Spindle cell  | 1         |            |           | 1         |
| Not specified |           |            | 2         | 2         |
| <b>Total</b>  | <b>11</b> | <b>3</b>   | <b>19</b> | <b>33</b> |

**A**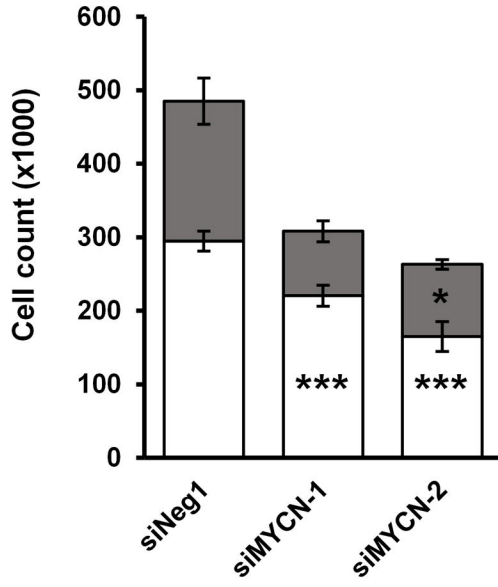**B**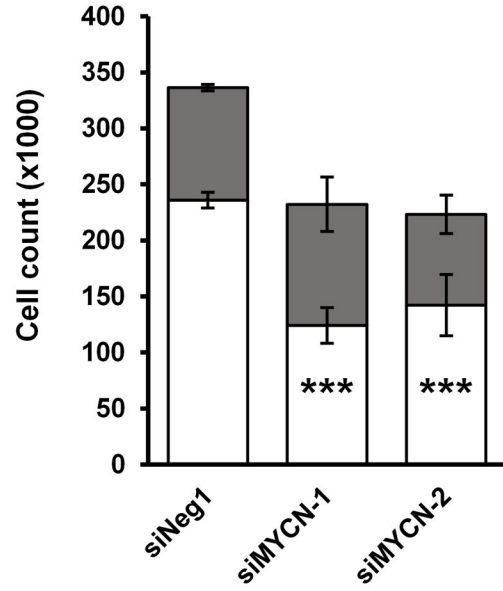

|          |   |   |   |
|----------|---|---|---|
| siNeg    | + | - | - |
| siMYCN-1 | - | + | - |
| siMYCN-2 | - | - | + |

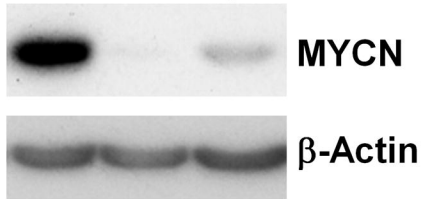

|          |   |   |   |
|----------|---|---|---|
| siNeg    | + | - | - |
| siMYCN-1 | - | + | - |
| siMYCN-2 | - | - | + |

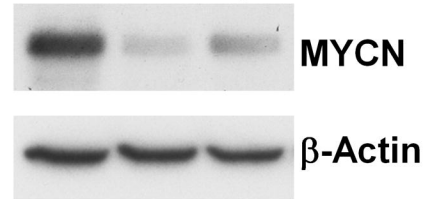

A

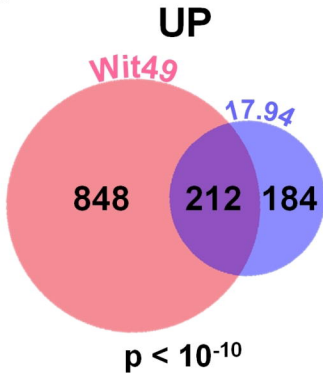

DOWN

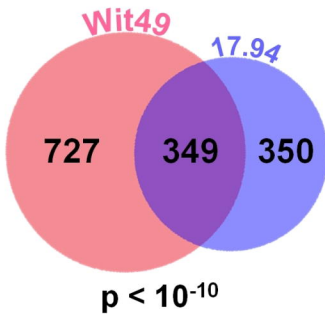

B

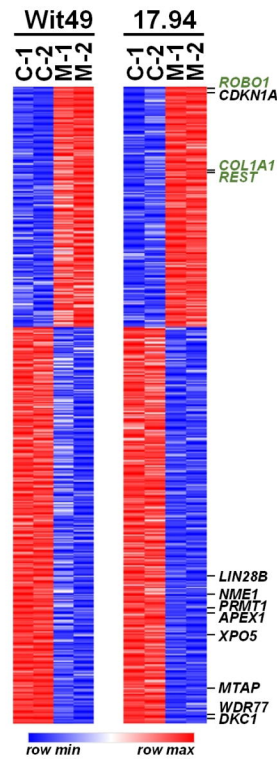

C

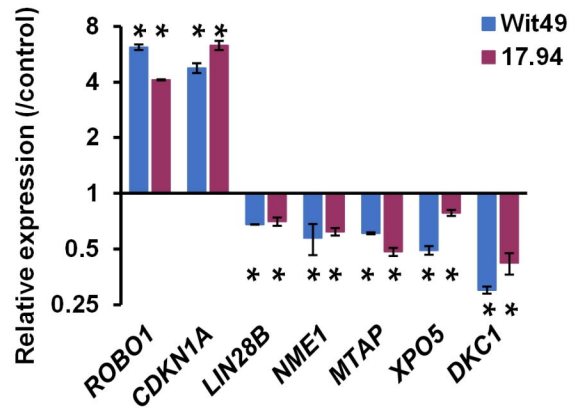

D

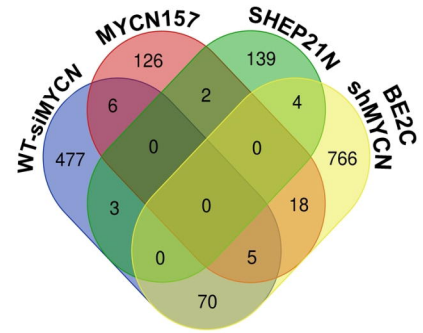

E

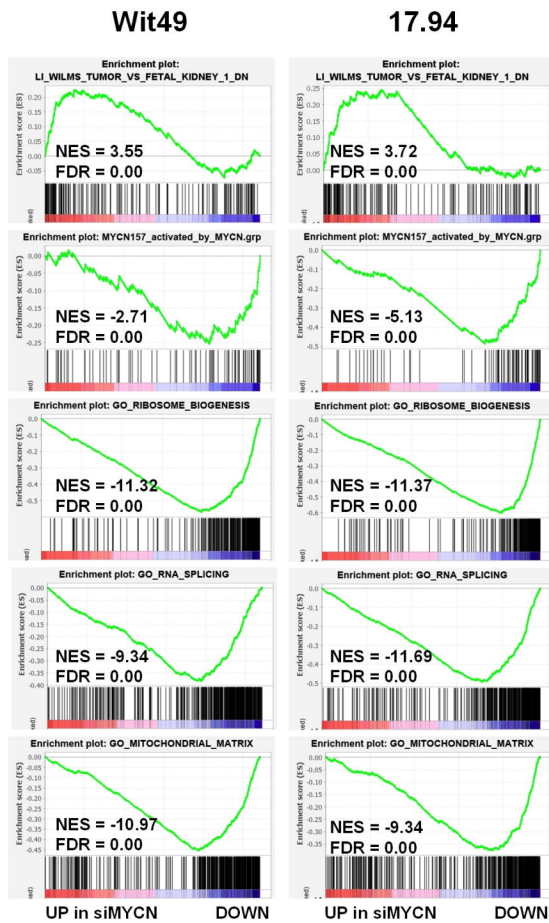

F

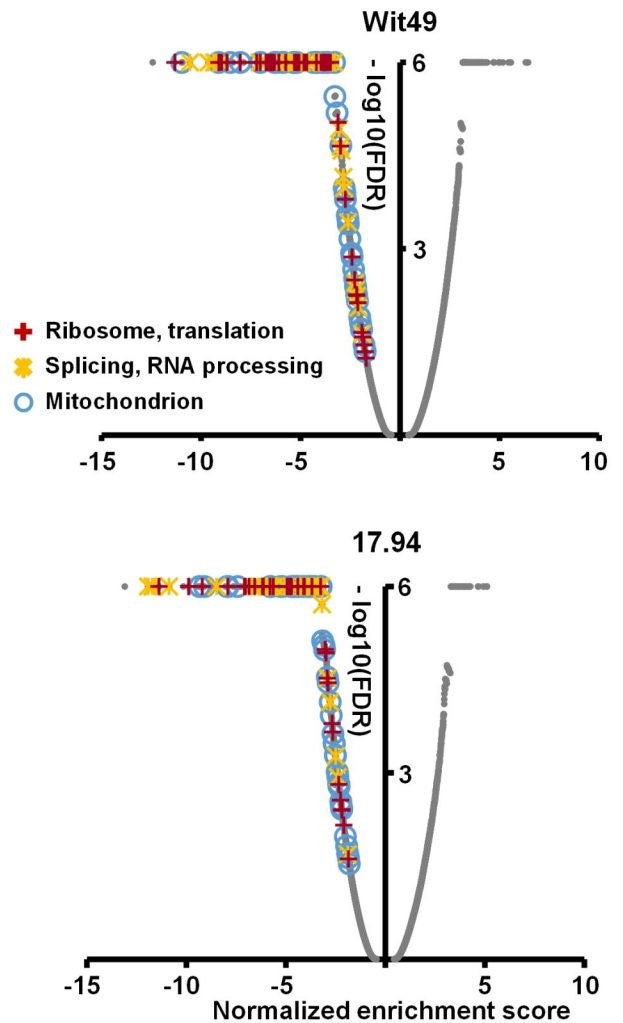

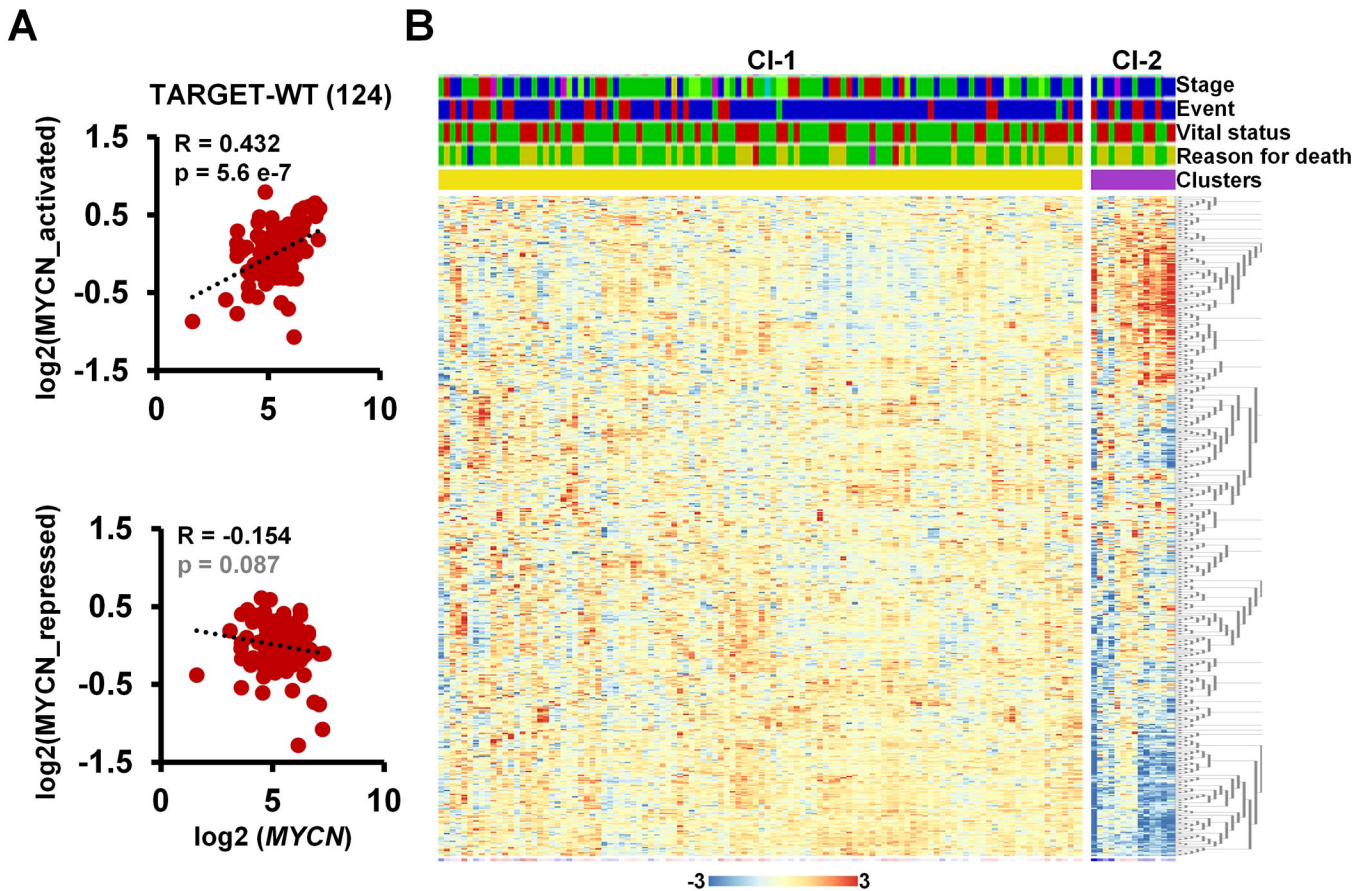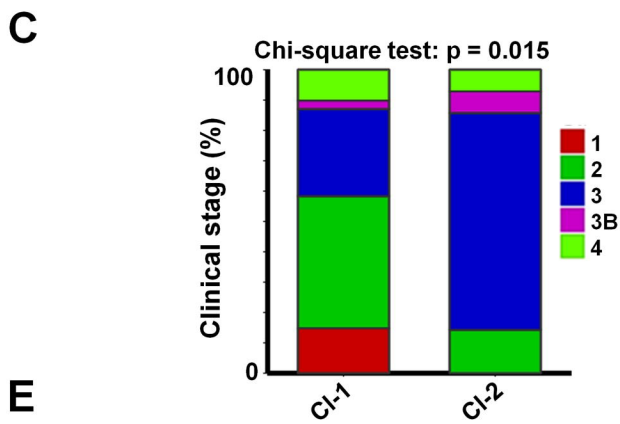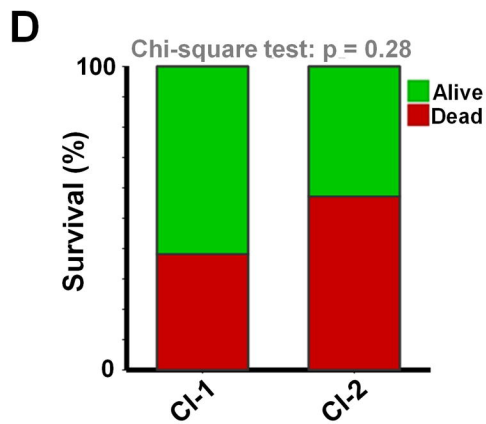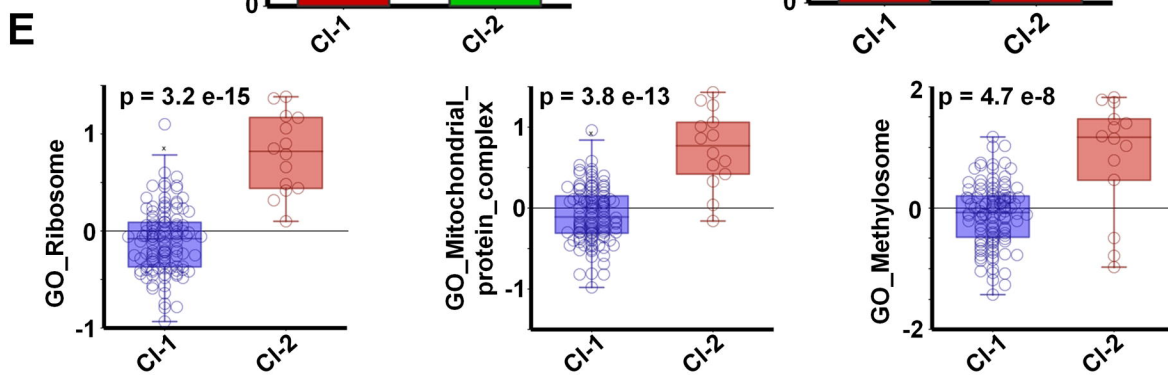

**A**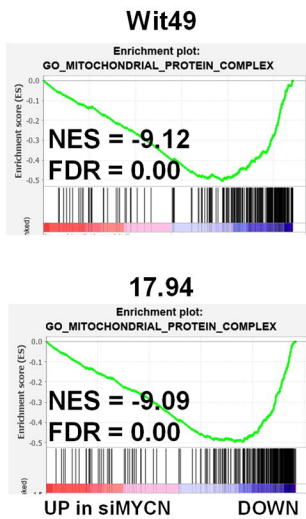**B**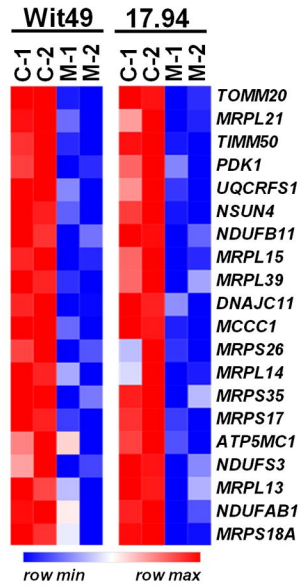**C**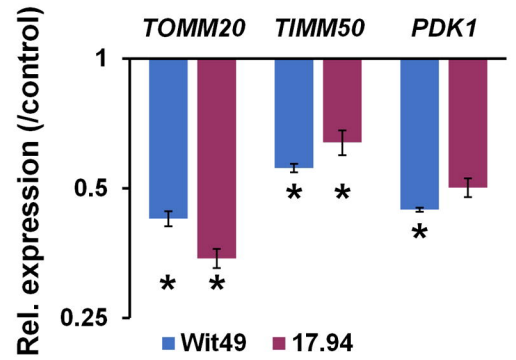**D**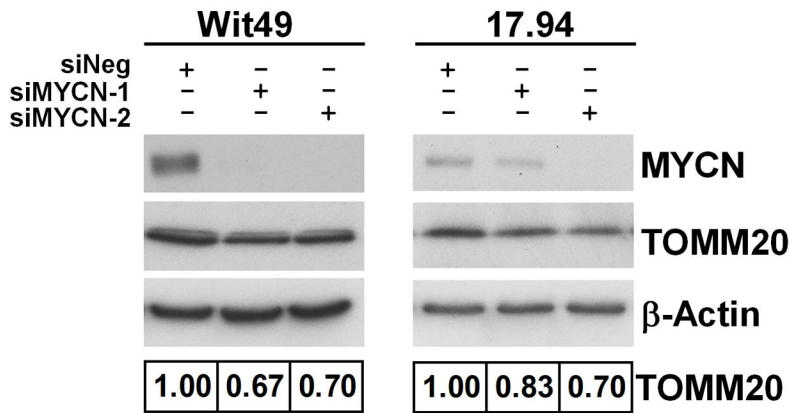**E**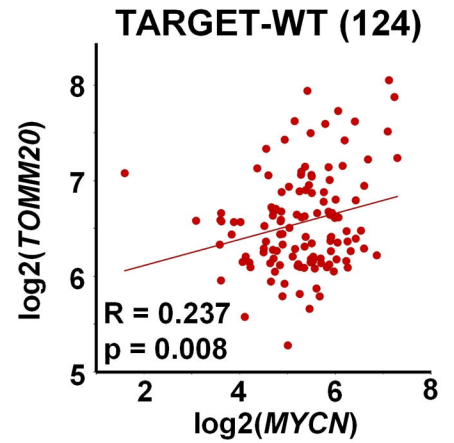**F**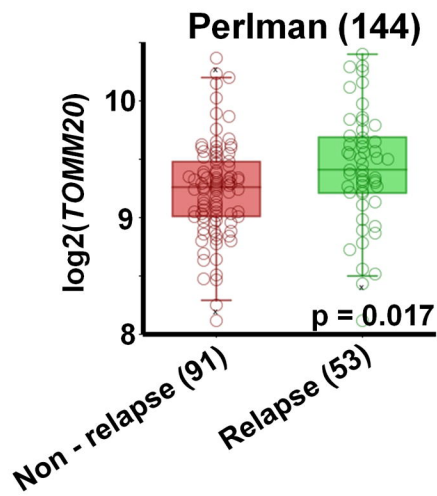**G**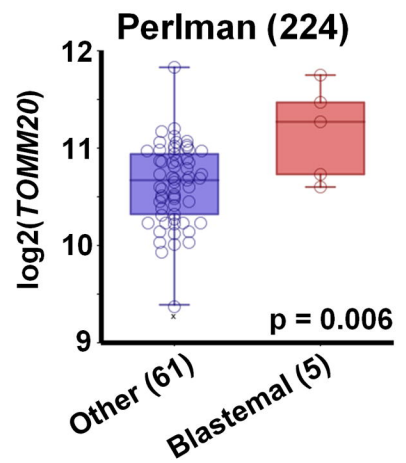

**A**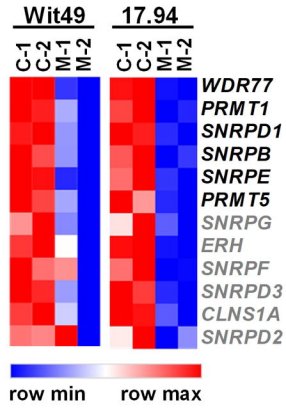**C**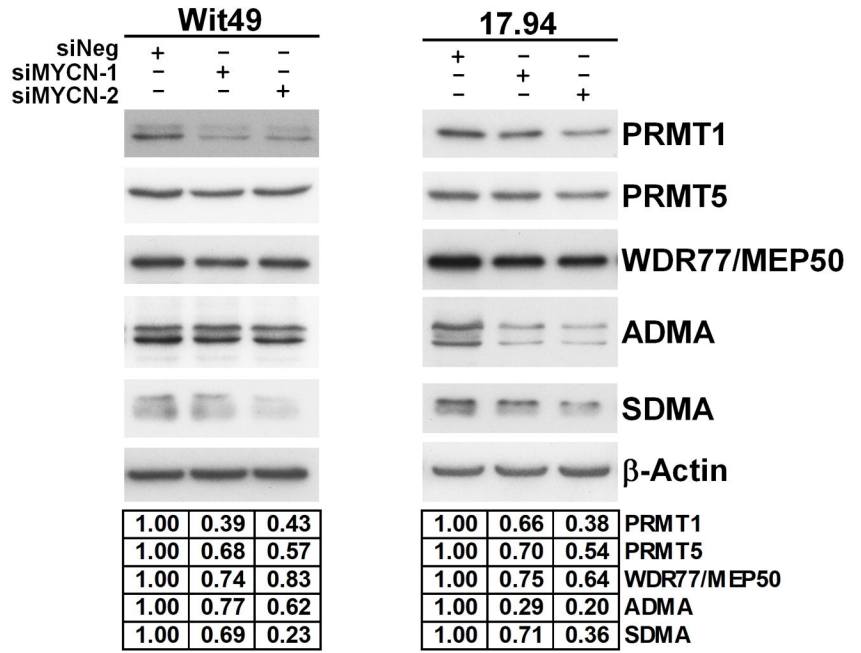**B**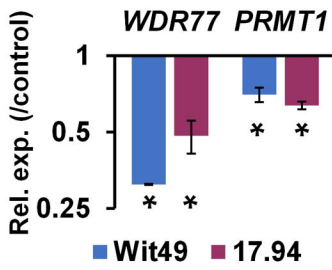**D**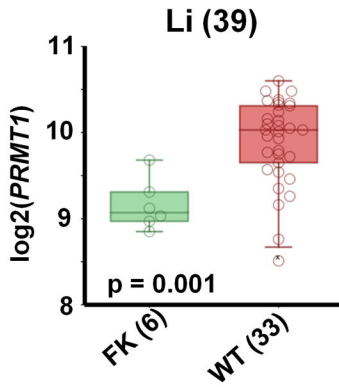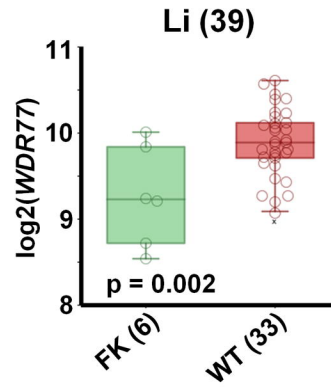

**A**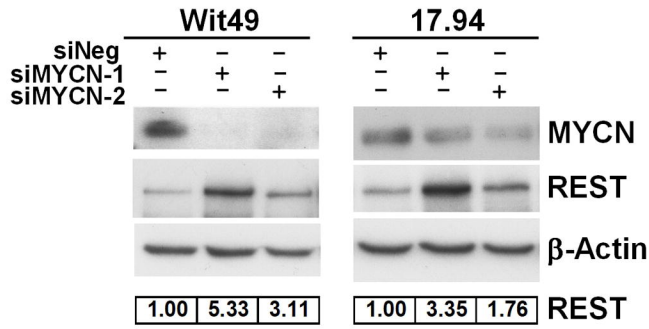**B**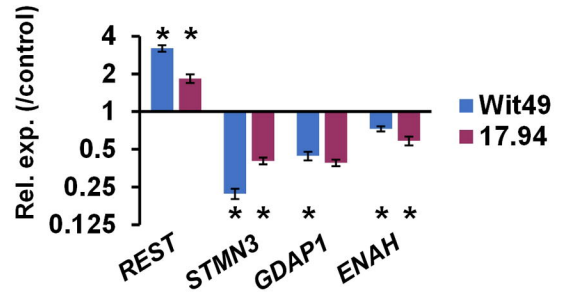**C**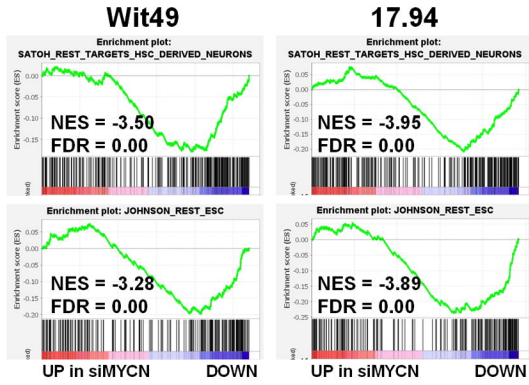**D**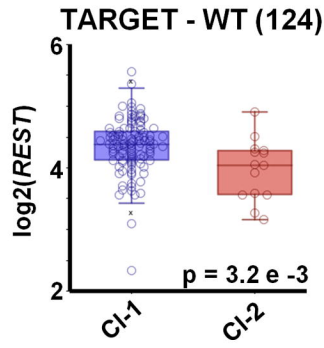**E**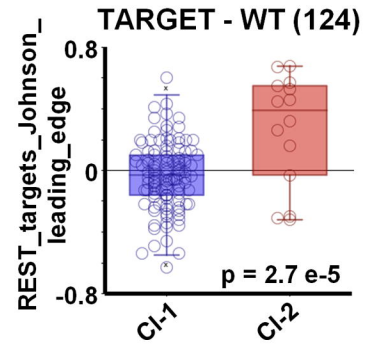**F**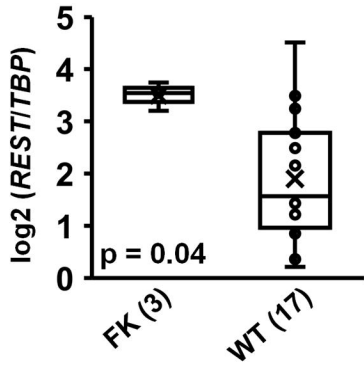**G**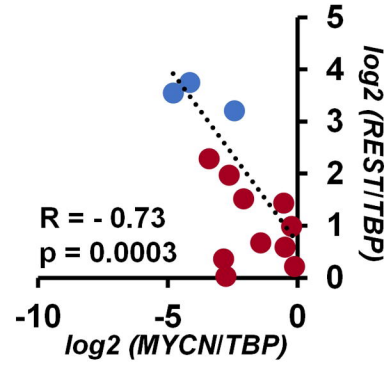



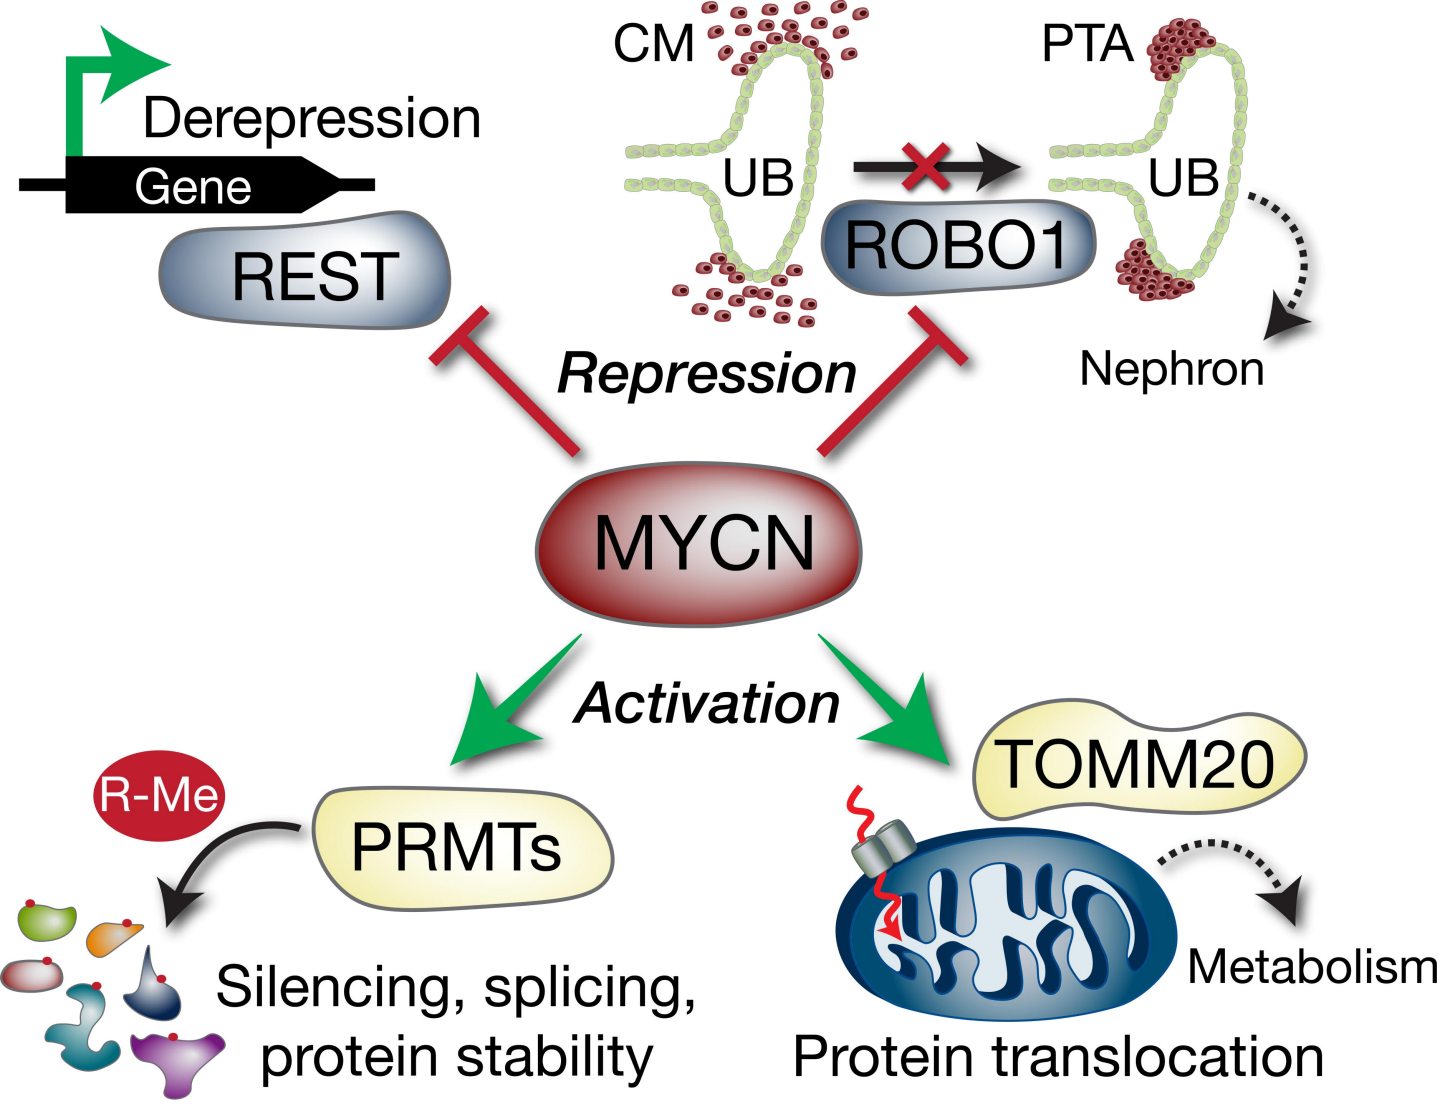

Source: https://biorxiv.org/content/10.1101/2021.01.11.426177v1.full.pdf
